# Supplementary material for: Malaria vector species in Amazonian Peru co-occur in larval habitats but have distinct larval microbial communities
Source: PLoS Negl Trop Dis. 2019 May 15;13(5):e0007412. doi: 10.1371/journal.pntd.0007412 (PMC6538195; doi:10.1371/journal.pntd.0007412)
Supplement: S3 Dataset — A data dictionary is included in the second sheet. (XLSX) [file pntd.0007412.s005.xlsx]

## Sheet: cri_final
id_cri	collection	locality	season	date	site_cat	veg_trees	veg_bushes	veg_grass	veg_floating	veg_emergent	veg_algae	water_temporality	water_moving	water_turbid	cloud_cover	shade_level	presence_fish	presence_amphibians	bed_material	depth_m	alkalinity	ph	hardness	conductivity	salinity_ppm	temp_c	light_fc	evi_50m	ndvi_50m	ndwi_50m	evi_100m	ndvi_100m	ndwi_100m	evi_250m	ndvi_250m	ndwi_250m	evi_500m	ndvi_500m	ndwi_500m	dist_to_forest	forestcover16_50m	forestloss10.16_50m	forestcover16_100m	forestloss10.16_100m	forestcover16_250m	forestloss10.16_250m	forestcover16_500m	forestloss10.16_500m	disttohouse_m
lup-1	icemr1_janfeb2016	lup	rainy	2016-02-02	natural	no	no	yes	no	yes	no	permanent	yes	no	cloudy	total	yes	no	sand	5	zero	5.4	zero	29.9	4.3	29	117	0.4515	0.5265	0.2985	0.519	0.556	0.3125	0.5865	0.5965	0.329	0.615	0.6315	0.356	6.78142	14.7139	69.3182	45.4162	34.0885	63.9814	8.12818	63.1254	3.72408	85.6231
lup-10	icemr1_janfeb2016	lup	rainy	2016-02-05	natural	yes	yes	yes	no	yes	no	temporal			cloudy				organic material	5	zero	5.1	zero	40.1	3.2	28.9	375	0.534	0.6145	0.331	0.5455	0.616	0.341	0.58	0.6285	0.3475	0.623	0.648	0.3655	0	98.2561	0	74.5173	0	62.2646	7.52319	68.7356	3.64332	38.9928
lup-11	icemr1_janfeb2016	lup	rainy	2016-02-05	natural	yes	yes	yes	no	yes	no	temporal	no	no	cloudy	partial	yes	no	organic material	3	zero	4	zero	52	5.2	29.3	288	0.583	0.6355	0.37	0.5895	0.6315	0.362	0.646	0.665	0.347	0.6705	0.6805	0.3655	0	34.169	0	42.6043	10.8983	63.0807	5.67471	69.637	4.14489	43.9007
lup-12	icemr1_janfeb2016	lup	rainy	2016-02-05	natural	yes	yes	yes	no	yes	no	temporal	no	no	cloudy	total	yes	no	organic material	3	zero	4.2	zero	58	6.1	28.3	302	0.744	0.695	0.279	0.7345	0.704	0.268	0.7535	0.714	0.33	0.7365	0.711	0.359	64.7726	69.9891	0	81.5907	0	72.6009	4.19978	67.9934	5.53367	107.812
lup-13	icemr1_janfeb2016	lup	rainy	2016-02-05	natural	no	yes	yes	no	yes	no	temporal	no	no	cloudy	total	no	no	sand	3	zero	5.2	zero	29.1	3.5	29	210	0.464	0.4905	0.2925	0.4945	0.533	0.3095	0.5685	0.5915	0.334	0.6075	0.6375	0.3635	0	25.9924	0	52.7613	4.03154	56.8182	7.69185	63.8871	3.68115	28.401
lup-14	icemr1_janfeb2016	lup	rainy	2016-02-02	natural							temporal	no	no	clear	total	no	no	sand	3	zero	5.7	zero	12.7	2.3	29.1	410	0.685	0.665	0.2675	0.6895	0.6665	0.2785	0.7245	0.695	0.327	0.7145	0.699	0.358	126.703	67.5434	0	55.0446	0	70.5227	1.97726	66.4921	5.66178	52.9272
lup-15	icemr1_janfeb2016	lup	rainy	2016-02-02	artificial	yes	no	no	no	no	no	permanent	no	no	clear	total	no	no	mud	4	zero	5.1	non-zero	22.6	2.5	29	402	0.6825	0.668	0.3155	0.6785	0.6575	0.276	0.701	0.6865	0.3275	0.703	0.6935	0.3575	131.389	36.5976	0	39.4955	0	68.1396	2.04611	66.4077	5.63967	27.3739
lup-16	icemr1_janfeb2016	lup	rainy	2016-02-03	artificial	yes	no	no	no	no	no	temporal	no	no	cloudy	total	no	no	mud	5	zero	5.7	non-zero	29.2	3.7	29.1	502	0.7345	0.7015	0.2955	0.739	0.6945	0.3265	0.729	0.702	0.326	0.719	0.701	0.3615	51.6158	80.3047	0	64.7139	0	72.2772	2.39268	68.0236	5.77404	58.19
lup-17	icemr1_janfeb2016	lup	rainy	2016-02-04	natural	no	yes	no	no	no	no	temporal	no	no	clear	total	no	yes	sand	4	zero	5.8	non-zero	18.5	4.1	29.3	505	0.709	0.7005	0.381	0.698	0.6825	0.3615	0.6935	0.685	0.3235	0.701	0.6935	0.3655	0	33.2401	0	54.3567	0.272109	70.4192	2.0926	69.7465	5.41369	31.2441
lup-18	icemr1_janfeb2016	lup	rainy	2016-02-04	natural	no	no	yes	no	yes	no	temporal	no	no	clear	total	no	no	sand	3	zero	6.1	zero	17.3	4.8	28.7	309	0.5575	0.628	0.35	0.558	0.627	0.3385	0.591	0.6445	0.3675	0.625	0.656	0.3625	0	52.5829	6.92974	48.5156	21.7634	63.0821	4.76806	69.6923	4.15609	63.7816
lup-19	icemr1_janfeb2016	lup	rainy	2016-02-04	natural	no	yes	no	no	no	no	temporal	no	no	clear	partial	yes	no	sand	4	zero	4.9	zero	21.2	4.9	29.3	413	0.547	0.621	0.302	0.5825	0.6345	0.3385	0.5915	0.6205	0.3445	0.623	0.6485	0.3675	0	92.173	1.40515	80.9377	6.75502	62.7495	7.40364	69.2546	3.31438	67.9119
lup-2	icemr1_janfeb2016	lup	rainy	2016-02-02	natural	yes	no	yes	no	yes	no	temporal	no	no	cloudy	total	yes	yes	sand	3	zero	5.1	zero	28.6	5.1	28.7	255	0.3845	0.478	0.2895	0.5115	0.5565	0.3005	0.578	0.592	0.3275	0.6155	0.6355	0.358	39.5701	23.6354	47.1306	46.1424	27.5902	62.4045	7.164	64.0166	3.67339	61.7254
lup-20	icemr1_janfeb2016	lup	rainy	2016-02-04	natural	no	no	yes	no	yes	no	temporal	no	no	clear	total	no	no	mixed	5	zero	6.2	zero	18.5	4.5	28.1	610	0.206	0.247	0.2925	0.2535	0.32	0.3085	0.374	0.415	0.291	0.549	0.5325	0.2905	23.1979	20.3482	0	33.1269	0	26.0766	12.5951	47.4989	1.92029	925.923
lup-21	icemr1_janfeb2016	lup	rainy	2016-02-04	natural	no	yes	yes	no	yes	no	temporal	no	no	clear	total	yes	no	mixed	3	zero	5.4	zero	25.2	5.2	29.1	510	0.1935	0.1825	0.324	0.205	0.2305	0.3065	0.355	0.3865	0.2825	0.5315	0.52	0.2855	14.0276	2.1846	0	29.8986	0	25.5804	7.82277	45.041	2.02363	937.147
lup-22	icemr1_janfeb2016	lup	rainy	2016-02-05	natural	no	no	yes	no	yes	no	temporal	no	no	clear	partial	yes	no	mixed	5	zero	5.3	zero	55.3	4.9	28.1	590	0.433	0.4595	0.284	0.436	0.4645	0.278	0.39	0.43	0.29	0.549	0.5375	0.2875	18.773	60.9333	0	40.2105	0	23.9493	13.6793	46.8713	1.94554	889.919
lup-23	icemr1_janfeb2016	lup	rainy	2016-02-05	natural							temporal	no	no	clear	partial	no	no	sand	3	zero	5.4	zero	22.1	3.5	29.1	613	0.512	0.556	0.32	0.525	0.557	0.316	0.5885	0.5985	0.3305	0.6105	0.6295	0.3555	0	43.2844	7.87038	50.0741	27.0305	64.1592	7.96053	62.4283	3.62712	90.2988
lup-24	icemr1_janfeb2016	lup	rainy	2016-02-05	natural	no	no	yes	no	yes	no	temporal	no	no	cloudy	total	no	no	sand	5	zero	4.8	zero	19.9	3.8	28.2	490	0.545	0.5965	0.2905	0.5795	0.6175	0.3305	0.5905	0.6115	0.341	0.625	0.6455	0.365	0	76.1308	10.9056	84.0788	8.92498	63.2345	7.37479	68.8418	3.00217	93.8519
lup-3	icemr1_janfeb2016	lup	rainy	2016-02-03	natural	no	no	yes	yes	yes	no	permanent	no	no	cloudy	partial	yes	no	organic material	3	zero	5.5	zero	31.9	2.2	29	356	0.3845	0.4725	0.2925	0.5035	0.5435	0.297	0.5695	0.592	0.328	0.613	0.6365	0.36	30.3274	25.7889	31.6017	45.4871	24.8877	60.902	7.22441	64.0393	3.6713	48.5955
lup-4	icemr1_janfeb2016	lup	rainy	2016-02-03	natural	yes	no	yes	no	yes	no	permanent	no	no	clear	total	yes	no	organic material	4	zero	4.7	non-zero	54	4.9	28.5	135	0.5215	0.5905	0.3345	0.5285	0.5905	0.332	0.57	0.6245	0.349	0.617	0.6495	0.3645	0	45.4397	0	38.6322	0	56.2843	5.42575	67.6289	3.82439	26.2399
lup-5	icemr1_janfeb2016	lup	rainy	2016-02-03	natural	yes	no	yes	no	yes	no	temporal	no	no	cloudy	total	no	no	organic material	4	zero	4.5	non-zero	45.2	5.3	29.2	160	0.5685	0.636	0.3395	0.576	0.6385	0.34	0.5935	0.647	0.369	0.627	0.658	0.3635	0	49.5904	31.934	50.7245	23.5107	63.5244	5.34472	69.5625	4.16463	67.0832
lup-6	icemr1_janfeb2016	lup	rainy	2016-02-03	natural	yes	no	yes	no	no	no	temporal	no	no			yes	no	organic material	5	zero	5.2	zero	22.4	3.2	29.5	255	0.503	0.5665	0.319	0.478	0.516	0.2975	0.5635	0.595	0.334	0.615	0.6445	0.363	10.1504	85.5356	0	45.6987	5.08997	55.1153	7.92541	65.6642	3.63595	29.4152
lup-7	icemr1_janfeb2016	lup	rainy	2016-02-03	natural	yes	no	yes	no	yes	no	permanent	no	no			yes	no	sand	5	zero	4.9	zero	29.4	3.7	29	302	0.5385	0.6115	0.332	0.536	0.6095	0.3325	0.574	0.6345	0.3515	0.621	0.6495	0.3625	0	79.673	0	56.7464	0	62.5768	5.1481	68.3465	4.29285	59.4811
lup-8	icemr1_janfeb2016	lup	rainy	2016-02-03	natural	no	yes	yes	no	yes	no	permanent	no	no	cloudy	partial	yes	no	sand	5	zero	5.2	zero	31.5	4.1	28.7	285	0.543	0.6165	0.3555	0.534	0.596	0.332	0.5755	0.6335	0.3545	0.619	0.651	0.3625	0	47.2737	0	41.5087	1.06289	59.4867	4.02102	68.1774	4.0884	41.0474
lup-9	icemr1_janfeb2016	lup	rainy	2016-02-04	natural	yes	no	yes	no	yes	no	permanent	no	no	cloudy	partial	yes	yes	organic material	4	zero	5.4	zero	37.2	2.9	29.1	302	0.5715	0.6395	0.3815	0.5415	0.6045	0.3335	0.579	0.637	0.358	0.623	0.655	0.3615	0	51.9388	0	36.2344	19.8085	59.607	4.41036	69.0233	4.08629	29.7939
nho-1	icemr1_janfeb2016	nho	rainy	2016-01-20	artificial	yes	yes	yes	no	yes	no	permanent	no	no	cloudy	partial	yes	yes	mixed	3	zero	4.3	zero	29.9	4.1	29	250	0.364	0.4245	0.3485	0.6025	0.588	0.328	0.6795	0.6365	0.3265	0.7375	0.6655	0.356	20.8233	37.8747	0	53.5162	0	49.4871	0	51.807	4.32224	157.549
nho-10	icemr1_janfeb2016	nho	rainy	2016-01-21	artificial							permanent	no	no	clear	partial	yes	yes		3	zero	5.3	zero	28.9	4.4	28.7	730	0.66	0.6085	0.228	0.6905	0.633	0.3135	0.6915	0.635	0.322	0.7295	0.6595	0.352	18.8339	62.035	0	55.3863	0	41.2571	0.426239	54.1843	2.64268	336.319
nho-11	icemr1_janfeb2016	nho	rainy	2016-01-22	natural							permanent	no	no	cloudy	none	no	no	mud	3	zero	5.5	zero	32.3	2.7	28.9	590	0.6275	0.5815	0.294	0.652	0.608	0.3155	0.674	0.628	0.3215	0.7235	0.653	0.3485	28.6406	13.8904	0	40.6327	0	44.6617	0	50.249	4.33967	195.89
nho-12	icemr1_janfeb2016	nho	rainy	2016-01-22	natural	no	yes	yes	no	no	no	permanent	no	no	cloudy	partial	yes	no	sand	4	zero	4.9	zero	34.5	3.5	28.2	420	0.8225	0.6945	0.4	0.7995	0.6875	0.372	0.6775	0.6225	0.3355	0.734	0.6465	0.3335	0	92.1739	0	72.589	0	49.7323	0	45.8531	2.25173	294.252
nho-13	icemr1_janfeb2016	nho	rainy	2016-01-23	natural							permanent			clear	partial	no	no	mud	3	zero	4.9	zero	41.2	4.1	28.1	610	0.534	0.494	0.274	0.5665	0.51	0.276	0.6165	0.56	0.2995	0.728	0.653	0.3445	71.1793	31.9498	0	38.8916	0	37.7334	0.275197	48.8084	3.87586	84.3107
nho-2	icemr1_janfeb2016	nho	rainy	2016-01-21	artificial	yes	no	yes	no	yes	no	permanent	no	no	cloudy	partial	yes	no	sand	5	zero	5.1	zero	28.5	5.3	28.9	320	0.696	0.6295	0.2915	0.6975	0.63	0.2845	0.695	0.63	0.3215	0.7515	0.669	0.3485	94.3748	0	0	3.4001	0	18.8026	0	46.2991	0.250353	1200.52
nho-3	icemr1_janfeb2016	nho	rainy	2016-01-21	artificial	no	yes	yes	no	yes	no	permanent	no	no	cloudy	partial	yes	yes	mixed	5	zero	5.2	zero	35.5	5.2	28.4	285	0.7575	0.676	0.377	0.7465	0.659	0.358	0.632	0.592	0.311	0.7275	0.6465	0.3365	10.6727	90.0272	0	57.4613	0	45.4375	0.903856	47.6389	0.924003	190.414
nho-4	icemr1_janfeb2016	nho	rainy	2016-01-20	artificial	yes	yes	yes	no	yes	no	temporal	no	no	cloudy	partial	yes	no	mixed	5	zero	4.8	zero	33.4	4.9	28	260	0.4865	0.533	0.3725	0.6305	0.604	0.351	0.6835	0.626	0.315	0.7315	0.6615	0.351	19.9764	73.627	0	50.4644	0	35.0261	1.08662	56.3844	1.96334	422.64
nho-5	icemr1_janfeb2016	nho	rainy	2016-01-22	artificial	yes	yes	yes	no	yes	no	permanent	no	no	cloudy	total	yes	yes	mud	3	zero	4	non-zero	29.7	2.3	27.9	410	0.493	0.5515	0.296	0.605	0.6035	0.318	0.691	0.6335	0.3155	0.7315	0.6635	0.351	0	19.9021	0	50.1671	0	35.6378	1.89346	57.1696	2.33831	405.538
nho-6	icemr1_janfeb2016	nho	rainy	2016-01-23	artificial	no	no	yes	no	yes	no	permanent	no	no	cloudy	partial	yes	no	sand	4	zero	5.3	zero	39.9	2.4	28	387	0.6455	0.5925	0.386	0.713	0.622	0.348	0.7395	0.6555	0.3395	0.7485	0.6615	0.3455	2.1057	11.2806	0	27.633	0	42.4148	0.209901	49.3417	0.926062	441.403
nho-7	icemr1_janfeb2016	nho	rainy	2016-01-23	artificial	no	yes	yes	no	yes	no	permanent	no	no	cloudy	partial	yes	no		3	zero	5.7	zero	41.2	3.6	29.1	297	0.673	0.62	0.3195	0.7105	0.6375	0.3305	0.716	0.6415	0.332	0.7435	0.6645	0.3535	34.5891	5.16304	0	20.6312	0	43.7988	1.07098	52.9887	1.46178	520.37
nho-8	icemr1_janfeb2016	nho	rainy	2016-01-23	artificial	no	no	yes	no	yes	no	permanent	no	no	cloudy	total			mixed	5	zero	4.8	zero	40.7	6.7	28.4	416	0.7235	0.63	0.31	0.747	0.6445	0.3095	0.757	0.661	0.341	0.7725	0.669	0.3465	52.8106	66.6667	0	37.5758	0	45.3351	0	46.4601	2.02529	477.24
nho-9	icemr1_janfeb2016	nho	rainy	2016-01-23	artificial	yes	yes	yes	no	yes	no	permanent	no	no	cloudy	partial	yes	no	mixed	4	zero	4.8	zero	40.7	4.3	28.5	510	0.6615	0.647	0.3455	0.7535	0.6845	0.351	0.744	0.685	0.354	0.755	0.684	0.3635	32.0659	20.327	0	93.2237	0	54.6926	1.08232	57.3777	3.01023	364.061
sem-1	icemr1_janfeb2016	sem	rainy	2016-02-26	natural	yes	yes	yes	no	yes	no	permanent	no	no	cloudy	partial	yes	yes	mixed	7	zero	4.8	non-zero	28.6	2.5	28.1	210	0.794	0.747	0.465	0.772	0.735	0.42	0.776	0.733	0.405	0.74	0.721	0.403		93.2425	0	78.8946	1.40606	52.9275	9.86352	83.1854	1.78329	72.6341
sem-2	icemr1_janfeb2016	sem	rainy	2016-02-27	natural	yes	no	no	no	yes	no	permanent	no	no	cloudy	partial	yes	no	mixed	7	zero	5.5	zero	22.2	3.5	29.2	506	0.36	0.512	0.309	0.535	0.612	0.35	0.709	0.706	0.396	0.748	0.728	0.412		86.6232	0	76.5789	0	77.5338	0	82.6473	0	52.8547
sem-3	icemr1_janfeb2016	sem	rainy	2016-02-27	natural							temporal	no	no	clear	none			sand	1	zero	4.8	zero	31.5	5.5	29.1	490	0.31	0.46	0.223	0.535	0.585	0.34	0.701	0.697	0.386	0.748	0.728	0.412		21.6776	0	55.0744	0	74.8331	0	81.332	1.02623	22.4392
sem-4	icemr1_janfeb2016	sem	rainy	2016-02-27	natural							temporal	no	no	clear	none			sand	1	zero	4.8	zero	29.3	5.9	28.6	708	0.388	0.431	0.241	0.542	0.598	0.299	0.693	0.697	0.387	0.752	0.728	0.411		5.45257	0	35.8813	0	70.3234	0	80.6143	1.83951	11.4318
sem-5	icemr1_janfeb2016	sem	rainy	2016-02-27	natural	no	no	yes	no	yes	no	temporal	no	no	cloudy	none	no	no	mixed	5	zero	4.7	zero	33.4	3.7	29	350	0.679	0.659	0.393	0.738	0.698	0.393	0.759	0.728	0.401	0.729	0.721	0.401		38.7222	0	58.6352	0	65.895	6.46659	83.2486	1.78374	36.4969
sem-6	icemr1_janfeb2016	sem	rainy	2016-02-27	natural	no	no	yes	no	yes	no	temporal	no	no	clear	none	yes	no	mixed	5	zero	5.2	zero	42.2	3.2	28	410	0.769	0.734	0.396	0.785	0.744	0.424	0.76	0.733	0.421	0.74	0.725	0.412		54.5852	0	80.9123	0	86.9544	0	83.6799	0.455853	156.862
tri-1	icemr1_janfeb2016	tri	rainy	2016-01-26	artificial	no	no	yes	no	yes	no	permanent	no	no	cloudy	partial	yes	yes	mixed	4	zero	4.8	zero	29.5	4.1	28.3	402	0.681	0.699	0.331	0.706	0.7085	0.3365	0.7385	0.7095	0.328	0.738	0.706	0.3335	42.9547	27.8804	0	45.8704	0	37.5177	10.4345	45.6664	7.49725	232.351
tri-10	icemr1_janfeb2016	tri	rainy	2016-01-27	natural							permanent	no	no	cloudy	none	yes	yes	mixed	1	zero	5.7	zero	32.5	4.1	29	319	0.601	0.577	0.354	0.584	0.592	0.3205	0.7305	0.695	0.326	0.7885	0.7315	0.3635	23.3061	90.7256	0	76.5921	0	38.1507	0	42.01	0.27579	204.923
tri-11	icemr1_janfeb2016	tri	rainy	2016-01-27	natural							temporal	no	no	clear	none	no	no	mixed	1	zero	5.3	zero	33.8		28.4	455	0.729	0.709	0.3355	0.7395	0.71	0.334	0.8135	0.7425	0.378	0.8	0.7395	0.3905	13.2654	66.0879	0	67.0869	0	48.9359	0	48.7636	1.19812	338.059
tri-12	icemr1_janfeb2016	tri	rainy	2016-01-28	artificial	yes	no	no	no	yes	no	temporal	no	no	cloudy	partial	yes	yes	mixed	5	zero	5.4	zero	44.3	3.5	28.5	512	0.879	0.7735	0.406	0.8415	0.754	0.3835	0.7805	0.7255	0.371	0.8	0.739	0.387	0	77.0403	0	75.6436	0	55.0889	0	45.0466	0.513227	288.26
tri-13	icemr1_janfeb2016	tri	rainy	2016-01-28	natural							temporal	no	no	cloudy	partial	yes	no	mud	1	zero	4.9	zero	41.3	4.2	29.1	418	0.7885	0.7115	0.311	0.6915	0.6445	0.2565	0.7265	0.693	0.3	0.7495	0.7035	0.3185	65.2565	0	0	2.21535	0	32.8618	0.646359	36.7698	3.35888	104.28
tri-14	icemr1_janfeb2016	tri	rainy	2016-01-28	artificial	yes	yes	no	no	yes	no	temporal	no	no	clear	none	yes	no	mixed	4	zero	4.7	zero	37.6	4.8	28.6	596	0.739	0.706	0.337	0.6305	0.646	0.3215	0.7045	0.667	0.3085	0.77	0.718	0.3395	60.0662	37.7451	0	49.3685	0	36.1161	0	38.792	0.72405	165.829
tri-15	icemr1_janfeb2016	tri	rainy	2016-01-28	natural							temporal	no	no	cloudy	none	no	no	mixed	1	zero	5.2	zero	39.1	4.9	28.4	511	0.7795	0.7105	0.3325	0.788	0.7205	0.3445	0.7365	0.7045	0.355	0.785	0.7255	0.3675	0	2.84308	0	35.0049	0	53.8946	0.329885	39.6177	0.583082	174.159
tri-2	icemr1_janfeb2016	tri	rainy	2016-01-26	natural	no	no	yes	no	yes	no	temporal	no	no	cloudy	total	yes	yes		3	zero	5.8	zero	35.2	4.4	28.8	210	0.818	0.7505	0.389	0.7715	0.731	0.3675	0.721	0.698	0.3125	0.7345	0.6995	0.3225	12.7301	70.1954	0	58.651	0	29.2412	5.54089	43.2829	5.16487	157.79
tri-3	icemr1_janfeb2016	tri	rainy	2016-01-27	artificial	no	no	yes	no	yes	no	permanent	no	no	cloudy	partial	yes	yes	mixed	5	zero	5.2	zero	41.4	4.8	28.3	310	0.8725	0.7735	0.4065	0.838	0.754	0.386	0.7645	0.714	0.363	0.8	0.7355	0.383	0	69.8913	0	62.8893	0	55.575	0	43.4346	0.532124	257.254
tri-4	icemr1_janfeb2016	tri	rainy	2016-01-27	artificial	no	no	yes	no	yes	no	permanent	no	no	cloudy	partial	yes	yes	mixed	4	zero	5.7	zero	33.7	4.3	28.2	280	0.806	0.738	0.3965	0.8495	0.764	0.404	0.784	0.727	0.3755	0.797	0.7275	0.3765	10.9069	71.926	0	62.8419	0	57.4192	1.62492	41.4832	0.557047	211.119
tri-5	icemr1_janfeb2016	tri	rainy	2016-01-28	natural	no	yes	yes	no	yes	no	permanent	no	no	cloudy	partial			sand	4	zero	5.9	zero	39.5	3.6	28.5	290	0.523	0.551	0.2235	0.631	0.5875	0.223	0.634	0.6235	0.287	0.7625	0.7105	0.3595	80.8708	0	0	5.76162	0	38.383	0	41.5828	0.555699	112.306
tri-6	icemr1_janfeb2016	tri	rainy	2016-01-28	artificial	yes	no	yes	no	yes	no	temporal	no	no	cloudy	partial	yes	yes	mixed	3	zero	4.4	zero	45.2	4.3	28.5	310	0.482	0.5755	0.3325	0.6115	0.6325	0.338	0.7635	0.715	0.3465	0.7925	0.7315	0.362	27.6513	68.5558	0	60.5097	0	39.0935	0	39.7493	0.29148	194.919
tri-7	icemr1_janfeb2016	tri	rainy	2016-01-29	natural	no	no	yes	no	yes	no	temporal	no	no	clear	total	yes	yes	mixed	3	zero	4.9	zero	44.7	3.1	29	315	0.5355	0.5955	0.274	0.603	0.6265	0.316	0.6815	0.6605	0.3155	0.77	0.716	0.348	10.0556	7.77596	0	29.8838	0	41.8458	0	42.1133	0.989817	83.9479
tri-8	icemr1_janfeb2016	tri	rainy	2016-01-26	natural	no	yes	no	no	yes	no	permanent	no	no	cloudy	partial	yes	yes	mixed	3	zero	4.9	zero	43	3.6	28.5	415	0.693	0.631	0.3615	0.6295	0.615	0.2715	0.6625	0.6415	0.3025	0.778	0.7235	0.3595	16.8469	43.5493	0	36.8233	0	36.3344	0	44.0361	0.410094	88.7237
tri-9	icemr1_janfeb2016	tri	rainy	2016-01-27	natural	no	yes	no	no	yes	no	permanent	no	no	cloudy	partial	yes	no	sand	5	zero	5.8	zero	29.7	4.7	28.7	429	0.5025	0.5635	0.395	0.558	0.595	0.3655	0.7235	0.692	0.3445	0.7625	0.716	0.3455	65.4111	27.8384	0	37.8091	0	41.9026	0	40.1122	3.26441	66.5192
lup-1	icemr2_apr2016	lup	rainy	2016-04-08	natural	no	no	yes	no	yes	no	permanent	no	no	cloudy	total	yes	no	sand	5	zero	5.6	zero	31.2	4	28.7	220	0.444	0.573	0.276	0.567	0.651	0.325	0.674	0.706	0.335	0.732	0.733	0.342	6.78142	14.7139	69.3182	45.4162	34.0885	63.9814	8.12818	63.1254	3.72408	85.6231
lup-10	icemr2_apr2016	lup	rainy	2016-04-10	natural	no	yes	yes	no	yes	no	temporal	no	no	cloudy	partial	yes	yes	organic material	5	zero	6.2	zero	31	4.2	29	530	0.682	0.697	0.253	0.695	0.697	0.273	0.718	0.709	0.295	0.748	0.735	0.334	0	98.2561	0	74.5173	0	62.2646	7.52319	68.7356	3.64332	38.9928
lup-11	icemr2_apr2016	lup	rainy	2016-04-10	natural	yes	yes	yes	no	yes	no	temporal	no	no	cloudy	total	yes	no	organic material	3	zero	4.3	zero	40	4.7	29	230	0.731	0.711	0.308	0.723	0.703	0.304	0.755	0.722	0.295	0.776	0.737	0.322	0	34.169	0	42.6043	10.8983	63.0807	5.67471	69.637	4.14489	43.9007
lup-12	icemr2_apr2016	lup	rainy	2016-04-11	natural	yes	yes	yes	no	yes	no	temporal	no	no	cloudy	total	yes	no	organic material	3	zero	4.2	zero	58	6.1	28.3	302	0.726	0.693	0.271	0.75	0.718	0.271	0.784	0.733	0.302	0.795	0.747	0.33	64.7726	69.9891	0	81.5907	0	72.6009	4.19978	67.9934	5.53367	107.812
lup-13	icemr2_apr2016	lup	rainy	2016-04-11	natural	no	yes	yes	no	yes	no	temporal	no	no	cloudy	total	no	no	sand	3	zero	4.8	non-zero	29	2.7	28.6	319	0.523	0.526	0.282	0.565	0.606	0.298	0.671	0.688	0.315	0.737	0.733	0.338	0	25.9924	0	52.7613	4.03154	56.8182	7.69185	63.8871	3.68115	28.401
lup-14	icemr2_apr2016	lup	rainy	2016-04-11	natural							temporal	no	no	clear	partial	no	no	sand	3	zero	4.9	zero	19.9	3.5	29.1	390	0.77	0.716	0.283	0.737	0.693	0.27	0.776	0.727	0.291	0.787	0.741	0.322	126.703	67.5434	0	55.0446	0	70.5227	1.97726	66.4921	5.66178	52.9272
lup-15	icemr2_apr2016	lup	rainy	2016-04-11	artificial	yes	no	no	no	no	no	permanent	no	no	cloudy	total	no	no	mud	3	zero	6.2	zero	18.5	3.8	29	502	0.778	0.722	0.294	0.737	0.692	0.266	0.77	0.723	0.289	0.783	0.74	0.319	131.389	36.5976	0	39.4955	0	68.1396	2.04611	66.4077	5.63967	27.3739
lup-16	icemr2_apr2016	lup	rainy	2016-04-11	artificial	yes	no	yes	no	yes	no	temporal	no	no	clear	total	no	no	mud	5	zero	5.4	non-zero	25.2	3.7	29.1	502	0.75	0.724	0.271	0.784	0.724	0.312	0.775	0.729	0.294	0.787	0.743	0.326	51.6158	80.3047	0	64.7139	0	72.2772	2.39268	68.0236	5.77404	58.19
lup-17	icemr2_apr2016	lup	rainy	2016-04-11	natural	no	yes	no	no	yes	no	temporal	no	no	clear	total	no	yes	sand	4	zero	5.3	non-zero	18.5	2.3	29.3	560	0.785	0.737	0.339	0.784	0.725	0.316	0.755	0.72	0.283	0.783	0.743	0.326	0	33.2401	0	54.3567	0.272109	70.4192	2.0926	69.7465	5.41369	31.2441
lup-18	icemr2_apr2016	lup	rainy	2016-04-11	natural	no	no	yes	no	yes	no	temporal	no	no	clear	total	no	no	sand	3	zero	5.4	non-zero	17.3	2.5	29.1	410	0.691	0.688	0.253	0.69	0.687	0.249	0.742	0.721	0.307	0.752	0.729	0.322	0	52.5829	6.92974	48.5156	21.7634	63.0821	4.76806	69.6923	4.15609	63.7816
lup-19	icemr2_apr2016	lup	rainy	2016-04-11	natural	no	yes	no	no	no	no	temporal	no	no	clear	partial	yes	no	sand	4	zero	4.8	zero	21.2	4.5	29.1	413	0.643	0.676	0.211	0.713	0.707	0.284	0.724	0.72	0.319	0.748	0.741	0.342	0	92.173	1.40515	80.9377	6.75502	62.7495	7.40364	69.2546	3.31438	67.9119
lup-2	icemr2_apr2016	lup	rainy	2016-04-08	natural	yes	no	yes	no	yes	no	temporal	no	no	cloudy	total	yes	yes	sand	3	zero	4.9	zero	29.1	5.2	28.5	300	0.354	0.496	0.276	0.566	0.644	0.298	0.671	0.693	0.326	0.737	0.735	0.338	39.5701	23.6354	47.1306	46.1424	27.5902	62.4045	7.164	64.0166	3.67339	61.7254
lup-20	icemr2_apr2016	lup	rainy	2016-04-11	natural	no	no	yes	no	yes	no	temporal	no	no	clear	total	no	no	mixed	6	zero	5.8	non-zero	12.7	5.2	29.3	619	0.049	0.147	0.429	0.121	0.292	0.412	0.261	0.46	0.37	0.537	0.66	0.365	23.1979	20.3482	0	33.1269	0	26.0766	12.5951	47.4989	1.92029	925.923
lup-21	icemr2_apr2016	lup	rainy	2016-04-11	natural	no	yes	yes	no	yes	no	temporal	no	no	cloudy	total	yes	no	mixed	3	zero	6.1	zero	22.6	4.9	28.8	510	0.005	0.018	0.423	0.039	0.114	0.398	0.231	0.409	0.36	0.51	0.637	0.361	14.0276	2.1846	0	29.8986	0	25.5804	7.82277	45.041	2.02363	937.147
lup-22	icemr2_apr2016	lup	rainy	2016-04-11	natural	no	no	yes	no	yes	no	temporal	no	no	clear	partial	yes	no	mixed	5	zero	5.7	non-zero	29.2	4.1	28.4	600	0.356	0.57	0.412	0.369	0.567	0.368	0.282	0.479	0.366	0.541	0.668	0.361	18.773	60.9333	0	40.2105	0	23.9493	13.6793	46.8713	1.94554	889.919
lup-23	icemr2_apr2016	lup	rainy	2016-04-11	natural							temporal	no	no	clear	partial	no	no	sand	4	zero	5.1	zero	55.3	4.8	28.3	620	0.551	0.651	0.343	0.57	0.653	0.331	0.674	0.708	0.335	0.728	0.733	0.341	0	43.2844	7.87038	50.0741	27.0305	64.1592	7.96053	62.4283	3.62712	90.2988
lup-24	icemr2_apr2016	lup	rainy	2016-04-11	natural	no	no	yes	no	yes	no	temporal	no	no	cloudy	total	no	no	sand	5	zero	5.7	zero	22.1	4.9	29.1	510	0.639	0.666	0.211	0.697	0.708	0.291	0.717	0.716	0.325	0.748	0.741	0.342	0	76.1308	10.9056	84.0788	8.92498	63.2345	7.37479	68.8418	3.00217	93.8519
lup-3	icemr2_apr2016	lup	rainy	2016-04-09	natural	yes	no	yes	no	yes	no	permanent	no	no	cloudy	partial	yes	no	organic material	3	zero	5.5	zero	48.2	2.2	29	520	0.354	0.496	0.282	0.565	0.626	0.291	0.665	0.693	0.319	0.74	0.735	0.338	30.3274	25.7889	31.6017	45.4871	24.8877	60.902	7.22441	64.0393	3.6713	48.5955
lup-4	icemr2_apr2016	lup	rainy	2016-04-09	natural	no	no	yes	no	yes	no	permanent	no	no	clear	total	yes	no	organic material	4	zero	6.1	zero	55	4.6	28.5	490	0.668	0.66	0.254	0.677	0.66	0.251	0.717	0.699	0.283	0.748	0.731	0.326	0	45.4397	0	38.6322	0	56.2843	5.42575	67.6289	3.82439	26.2399
lup-5	icemr2_apr2016	lup	rainy	2016-04-09	natural	yes	no	yes	no	yes	no	temporal	no	no	cloudy	total	no	no	organic material	4	zero	5.6	non-zero	45.2	5.3	31	220	0.675	0.681	0.232	0.691	0.688	0.249	0.744	0.725	0.307	0.752	0.729	0.322	0	49.5904	31.934	50.7245	23.5107	63.5244	5.34472	69.5625	4.16463	67.0832
lup-6	icemr2_apr2016	lup	rainy	2016-04-09	natural	yes	no	yes	no	yes	no	temporal	no	no	clear	partial	yes	no	sand	5	zero	4.9	non-zero	31	3	29	240	0.614	0.676	0.298	0.57	0.583	0.276	0.69	0.685	0.298	0.744	0.737	0.334	10.1504	85.5356	0	45.6987	5.08997	55.1153	7.92541	65.6642	3.63595	29.4152
lup-7	icemr2_apr2016	lup	rainy	2016-04-09	natural	yes	no	yes	no	yes	no	permanent	no	no	clear	partial	yes	no	sand	5	zero	4.8	zero	30	4.2	31	430	0.697	0.696	0.251	0.682	0.681	0.253	0.717	0.708	0.291	0.748	0.731	0.326	0	79.673	0	56.7464	0	62.5768	5.1481	68.3465	4.29285	59.4811
lup-8	icemr2_apr2016	lup	rainy	2016-04-09	natural	no	yes	yes	no	yes	no	permanent	no	no	cloudy	partial	yes	no	sand		zero	5.5	non-zero	32.8	4.4	28.9	310	0.684	0.681	0.28	0.678	0.665	0.251	0.728	0.709	0.291	0.748	0.729	0.322	0	47.2737	0	41.5087	1.06289	59.4867	4.02102	68.1774	4.0884	41.0474
lup-9	icemr2_apr2016	lup	rainy	2016-04-10	natural	no	yes	yes	no	yes	no	permanent	no	no	cloudy	partial	yes	yes	organic material	5	zero	5.6	zero		3.2	28.6	280	0.735	0.727	0.305	0.675	0.661	0.249	0.731	0.714	0.295	0.752	0.729	0.318	0	51.9388	0	36.2344	19.8085	59.607	4.41036	69.0233	4.08629	29.7939
nho-1	icemr2_apr2016	nho	rainy	2016-04-18	artificial	yes	yes	yes	no	no	no	permanent	no	no	cloudy	partial	yes	yes	mixed	5	zero	4.6	zero	32.8	5.2	28.7	310	0.282	0.399	0.339	0.578	0.603	0.314	0.654	0.665	0.312	0.738	0.713	0.358	20.8233	37.8747	0	53.5162	0	49.4871	0	51.807	4.32224	157.549
nho-10	icemr2_apr2016	nho	rainy	2016-04-21	artificial							permanent	no	no	clear	partial	yes	yes	mud	3	zero	5.7	zero	27.2	4.2	28.7	730	0.716	0.693	0.268	0.716	0.691	0.308	0.702	0.682	0.315	0.738	0.708	0.353	18.8339	62.035	0	55.3863	0	41.2571	0.426239	54.1843	2.64268	336.319
nho-11	icemr2_apr2016	nho	rainy	2016-04-21	natural							permanent	no	no	cloudy	none	no	no	mud	3	zero	5.4	zero	33.5	3.8	29.1	620	0.642	0.625	0.263	0.665	0.658	0.306	0.655	0.663	0.306	0.723	0.699	0.35	28.6406	13.8904	0	40.6327	0	44.6617	0	50.249	4.33967	195.89
nho-12	icemr2_apr2016	nho	rainy	2016-04-21	natural	no	yes	yes	no	no	no	permanent	no	no	cloudy	partial	yes	no	sand	4	zero	4.8	non-zero	41.2	2.6	29.4	510	0.846	0.772	0.417	0.813	0.763	0.381	0.639	0.666	0.34	0.731	0.691	0.326	0	92.1739	0	72.589	0	49.7323	0	45.8531	2.25173	294.252
nho-13	icemr2_apr2016	nho	rainy	2016-04-21	natural							permanent	no	no	clear	partial	no	no	mud	3	zero	4.7	zero	244.3	4.3	28.9	380	0.478	0.459	0.217	0.493	0.471	0.217	0.583	0.561	0.28	0.723	0.699	0.342	71.1793	31.9498	0	38.8916	0	37.7334	0.275197	48.8084	3.87586	84.3107
nho-2	icemr2_apr2016	nho	rainy	2016-04-18	artificial	yes	yes	yes	no	yes	no	permanent	no	no	clear	partial	yes	no	mud	5	zero	5.1	zero	28.5	5.3	28.9	320	0.69	0.667	0.283	0.69	0.667	0.275	0.683	0.668	0.33	0.747	0.715	0.354	94.3748	0	0	3.4001	0	18.8026	0	46.2991	0.250353	1200.52
nho-3	icemr2_apr2016	nho	rainy	2016-04-19	artificial	no	yes	yes	no	yes	no	permanent	no	no	clear	partial			mixed	5	zero	4.9	zero	40.1	5.5	28.3	245	0.772	0.753	0.391	0.759	0.724	0.37	0.581	0.622	0.297	0.723	0.691	0.33	10.6727	90.0272	0	57.4613	0	45.4375	0.903856	47.6389	0.924003	190.414
nho-4	icemr2_apr2016	nho	rainy	2016-04-19	artificial	yes	yes	yes	no	yes	no	temporal	no	no	cloudy	partial			mixed	5	zero	5.2	zero	35	4.8	29	320	0.445	0.555	0.378	0.63	0.648	0.35	0.689	0.677	0.311	0.738	0.716	0.353	19.9764	73.627	0	50.4644	0	35.0261	1.08662	56.3844	1.96334	422.64
nho-5	icemr2_apr2016	nho	rainy	2016-04-19	artificial	yes	yes	yes	no	yes	no	permanent	no	no	cloudy	total	yes	yes	mud	3	zero	4.6	zero	30.1	3.3	28.2	320	0.458	0.592	0.269	0.602	0.648	0.313	0.701	0.682	0.311	0.738	0.716	0.353	0	19.9021	0	50.1671	0	35.6378	1.89346	57.1696	2.33831	405.538
nho-6	icemr2_apr2016	nho	rainy	2016-04-20	artificial	yes	yes	yes	no	yes	no	permanent	no	no	cloudy	partial	yes	no	sand	4	zero	4.3	zero	40.2	3.2	29.1	520	0.657	0.666	0.442	0.726	0.681	0.365	0.746	0.716	0.342	0.746	0.716	0.342	2.1057	11.2806	0	27.633	0	42.4148	0.209901	49.3417	0.926062	441.403
nho-7	icemr2_apr2016	nho	rainy	2016-04-20	artificial	no	yes	yes	no	yes	no	permanent	no	no	cloudy	partial	yes	no	mixed	3	zero	5.6	zero	41.2	3.6	28.7	580	0.668	0.667	0.308	0.702	0.691	0.33	0.723	0.693	0.331	0.754	0.722	0.357	34.5891	5.16304	0	20.6312	0	43.7988	1.07098	52.9887	1.46178	520.37
nho-8	icemr2_apr2016	nho	rainy	2016-04-20	artificial	no	no	yes	no	yes	no	permanent	no	no	cloudy	total	yes	yes	mixed	5	zero	4.9	zero	32.2	5.5	27.3	320	0.738	0.693	0.31	0.772	0.714	0.299	0.754	0.715	0.337	0.77	0.723	0.342	52.8106	66.6667	0	37.5758	0	45.3351	0	46.4601	2.02529	477.24
nho-9	icemr2_apr2016	nho	rainy	2016-04-21	artificial	yes	yes	yes	no	yes	no	permanent	no	no	cloudy	total	yes	yes		4	zero	4.8	zero	40.7	4.3	28.5	510	0.643	0.694	0.323	0.772	0.733	0.347	0.767	0.74	0.353	0.762	0.74	0.365	32.0659	20.327	0	93.2237	0	54.6926	1.08232	57.3777	3.01023	364.061
sem-1	icemr2_apr2016	sem	rainy	2016-04-25	natural	yes	yes	yes	no	yes	no	permanent	no	no	cloudy	partial	yes	yes	mixed	7	zero	4.6	zero	31.5	2.9	29.2	240	0.947	0.687	0.414	0.863	0.664	0.405	0.803	0.587	0.363	0.702	0.522	0.335		93.2425	0	78.8946	1.40606	52.9275	9.86352	83.1854	1.78329	72.6341
sem-2	icemr2_apr2016	sem	rainy	2016-04-27	natural	no	yes	no	no	yes	no	permanent	no	no	cloudy		yes	no	mixed	7	zero	5.6	zero	24.2	3.5	29.2	540	0.506	0.396	0.303	0.624	0.49	0.325	0.709	0.542	0.35	0.67	0.525	0.345		86.6232	0	76.5789	0	77.5338	0	82.6473	0	52.8547
sem-3	icemr2_apr2016	sem	rainy	2016-04-27	natural							temporal	no	no	clear	none			sand	1	zero	4.9	non-zero	37.1	4.2	29.1	490	0.45	0.396	0.225	0.649	0.501	0.319	0.702	0.53	0.343	0.674	0.529	0.345		21.6776	0	55.0744	0	74.8331	0	81.332	1.02623	22.4392
sem-4	icemr2_apr2016	sem	rainy	2016-04-27	natural							temporal	no	no	clear	none			sand	2	zero	5.2	zero	25.3	5.9	28.6	610	0.541	0.446	0.253	0.625	0.509	0.284	0.702	0.532	0.343	0.685	0.537	0.347		5.45257	0	35.8813	0	70.3234	0	80.6143	1.83951	11.4318
sem-5	icemr2_apr2016	sem	rainy	2016-04-27	natural	no	no	yes	no	yes	no	temporal			cloudy	none	no	no	mixed	5	zero	4.8	non-zero	29.4	3.9	29	102	0.878	0.593	0.353	0.848	0.601	0.364	0.784	0.593	0.369	0.682	0.517	0.335		38.7222	0	58.6352	0	65.895	6.46659	83.2486	1.78374	36.4969
sem-6	icemr2_apr2016	sem	rainy	2016-04-27	natural	no	no	yes	no	yes	no	temporal	no	no	clear	none	yes	no	mixed	5	zero	3.2	zero	41.2	4.1	28	380	0.772	0.499	0.319	0.767	0.524	0.34	0.678	0.466	0.301	0.646	0.475	0.312		54.5852	0	80.9123	0	86.9544	0	83.6799	0.455853	156.862
tri-1	icemr2_apr2016	tri	rainy	2016-04-01	artificial	no	no	yes	no	yes	no	permanent	no	no	cloudy	partial	yes	yes	mixed	3	zero	4.2	zero	31.2	3.8	28	320	0.675	0.724	0.337	0.716	0.737	0.347	0.768	0.745	0.334	0.738	0.73	0.326	42.9547	27.8804	0	45.8704	0	37.5177	10.4345	45.6664	7.49725	232.351
tri-10	icemr2_apr2016	tri	rainy	2016-04-04	natural							permanent	no	no	cloudy	none	yes	yes	mixed	1	zero	5.4	zero	39.5	4.8	29	610	0.579	0.593	0.348	0.541	0.592	0.306	0.732	0.72	0.329	0.792	0.754	0.358	23.3061	90.7256	0	76.5921	0	38.1507	0	42.01	0.27579	204.923
tri-11	icemr2_apr2016	tri	rainy	2016-04-04	natural							temporal	no	no	clear	none	no	no	mixed	3	zero	5.9	zero	38.2	3.2	28.5	510	0.726	0.736	0.327	0.725	0.727	0.321	0.809	0.769	0.372	0.784	0.762	0.385	13.2654	66.0879	0	67.0869	0	48.9359	0	48.7636	1.19812	338.059
tri-12	icemr2_apr2016	tri	rainy	2016-04-04	artificial	yes	no	no	no	yes	no	temporal	no	no	cloudy	partial	yes	yes	mixed	5	zero	4.8	non-zero	45.1	4.1	28.5	480	0.873	0.8	0.402	0.85	0.78	0.378	0.769	0.746	0.362	0.784	0.761	0.381	0	77.0403	0	75.6436	0	55.0889	0	45.0466	0.513227	288.26
tri-13	icemr2_apr2016	tri	rainy	2016-04-04	natural							temporal	no	no	cloudy	partial	yes	no	mud	1	zero	5.3	zero	49.2	4.9	29.1	490	0.809	0.735	0.322	0.709	0.658	0.256	0.725	0.716	0.3	0.745	0.722	0.315	65.2565	0	0	2.21535	0	32.8618	0.646359	36.7698	3.35888	104.28
tri-14	icemr2_apr2016	tri	rainy	2016-04-04	artificial	yes	yes	no	no	yes	no	temporal	no	no	clear	none	yes	yes	mixed	4	zero	4.8	zero	35.3	4.1	28.4	510	0.763	0.736	0.339	0.647	0.672	0.324	0.693	0.676	0.304	0.77	0.739	0.338	60.0662	37.7451	0	49.3685	0	36.1161	0	38.792	0.72405	165.829
tri-15	icemr2_apr2016	tri	rainy	2016-04-04	natural							temporal	no	no	cloudy	none	no	no	mixed	1	zero	5.1	non-zero	28.1	5.1	28.9	320	0.777	0.729	0.326	0.794	0.74	0.337	0.709	0.715	0.341	0.77	0.746	0.362	0	2.84308	0	35.0049	0	53.8946	0.329885	39.6177	0.583082	174.159
tri-2	icemr2_apr2016	tri	rainy	2016-04-01	natural	no	no	yes	no	yes	no	temporal	no	no	cloudy	total	yes	no	sand	3	zero	4.1	non-zero	32.1	4.2	38.8	410	0.839	0.777	0.386	0.764	0.752	0.36	0.733	0.729	0.318	0.731	0.722	0.319	12.7301	70.1954	0	58.651	0	29.2412	5.54089	43.2829	5.16487	157.79
tri-3	icemr2_apr2016	tri	rainy	2016-04-02	artificial	no	no	yes	no	yes	no	permanent	no	no	cloudy	partial	yes	yes	mixed	5	zero	5.2	zero	41.4	4.8	28.3	310	0.871	0.8	0.403	0.85	0.78	0.382	0.747	0.731	0.353	0.784	0.754	0.377	0	69.8913	0	62.8893	0	55.575	0	43.4346	0.532124	257.254
tri-4	icemr2_apr2016	tri	rainy	2016-04-02	artificial	no	no	yes	no	yes	no	permanent	no	no	cloudy	partial	yes	yes	mixed	4	zero	4.9	non-zero	39	4.1	29	295	0.82	0.767	0.385	0.852	0.793	0.403	0.751	0.738	0.374	0.778	0.746	0.369	10.9069	71.926	0	62.8419	0	57.4192	1.62492	41.4832	0.557047	211.119
tri-5	icemr2_apr2016	tri	rainy	2016-04-03	natural	no	yes	yes	no	yes	no	permanent	no	no	cloudy	partial	yes	yes	sand	4	zero	6.1	zero	39.5	3.6	28.5	290	0.507	0.575	0.225	0.606	0.576	0.222	0.607	0.628	0.284	0.755	0.731	0.353	80.8708	0	0	5.76162	0	38.383	0	41.5828	0.555699	112.306
tri-6	icemr2_apr2016	tri	rainy	2016-04-04	artificial	yes	yes	yes	no	yes	no	temporal	no	no	cloudy	partial	yes	yes	mixed	3	zero	4.4	zero	45.2	4.3	28.5	310	0.425	0.587	0.306	0.609	0.665	0.326	0.77	0.741	0.345	0.792	0.754	0.358	27.6513	68.5558	0	60.5097	0	39.0935	0	39.7493	0.29148	194.919
tri-7	icemr2_apr2016	tri	rainy	2016-04-04	natural	no	no	yes	no	yes	no	temporal	no	no	clear	partial	yes	yes	mixed	3	zero	4.3	non-zero	42.1	3.3	28.1	410	0.471	0.583	0.289	0.554	0.634	0.32	0.655	0.667	0.309	0.77	0.738	0.342	10.0556	7.77596	0	29.8838	0	41.8458	0	42.1133	0.989817	83.9479
tri-8	icemr2_apr2016	tri	rainy	2016-04-04	natural	no	yes	no	no	yes	no	permanent	no	no	cloudy	partial	yes	yes	mixed	3	zero	4.2	zero	45	4.2	28.7	510	0.694	0.642	0.369	0.6	0.628	0.284	0.646	0.652	0.294	0.778	0.746	0.353	16.8469	43.5493	0	36.8233	0	36.3344	0	44.0361	0.410094	88.7237
tri-9	icemr2_apr2016	tri	rainy	2016-04-04	natural	no	yes	no	no	yes	no	permanent	no	no	cloudy	partial	yes	no	sand	5	zero	5.1	non-zero	26	5.1	28.2	490	0.344	0.508	0.385	0.455	0.57	0.364	0.708	0.707	0.334	0.763	0.738	0.342	65.4111	27.8384	0	37.8091	0	41.9026	0	40.1122	3.26441	66.5192
lup-1	icemr3_julaug2016	lup	dry	2016-07-04	natural	no	no	yes	no	yes	no	permanent	no	no		total			sand	5	zero	5.1	non-zero	39.7	4.2	29.1	234	0.604	0.58	0.144	0.745	0.667	0.249	0.819	0.704	0.335	0.853	0.732	0.373	6.78142	14.7139	69.3182	45.4162	34.0885	63.9814	8.12818	63.1254	3.72408	85.6231
lup-10	icemr3_julaug2016	lup	dry	2016-07-06	natural	no	yes	yes	no	yes	no	temporal	no	no	cloudy	partial	no	no	organic material	5	zero	5.8	zero	35	4.2	28.6	420	0.823	0.714	0.354	0.829	0.714	0.338	0.819	0.713	0.337	0.842	0.725	0.365	0	98.2561	0	74.5173	0	62.2646	7.52319	68.7356	3.64332	38.9928
lup-11	icemr3_julaug2016	lup	dry	2016-07-06	natural	yes	yes	yes	no	yes	no	temporal	no	no	cloudy	partial	yes	no	organic material	3	zero	5.3	non-zero	41	5.1	29.1	620	0.828	0.714	0.331	0.81	0.691	0.325	0.838	0.705	0.345	0.845	0.721	0.354	0	34.169	0	42.6043	10.8983	63.0807	5.67471	69.637	4.14489	43.9007
lup-12	icemr3_julaug2016	lup	dry	2016-07-06	natural	yes	yes	yes	no	yes	no	temporal	no	no	cloudy	partial	yes	yes	organic material	3	zero	5.2	zero	61	4.9	29	420	0.657	0.617	0.294	0.786	0.681	0.311	0.853	0.718	0.348	0.869	0.725	0.357	64.7726	69.9891	0	81.5907	0	72.6009	4.19978	67.9934	5.53367	107.812
lup-13	icemr3_julaug2016	lup	dry	2016-07-06	natural	no	no	yes	yes	yes	no	temporal	no	no	cloudy	partial	no	no	sand	3	zero	5.2	non-zero	39	4.2	28.7	670	0.699	0.625	0.223	0.737	0.662	0.267	0.795	0.701	0.325	0.853	0.728	0.369	0	25.9924	0	52.7613	4.03154	56.8182	7.69185	63.8871	3.68115	28.401
lup-15	icemr3_julaug2016	lup	dry	2016-07-06	artificial	yes	yes	no	no	no	no	permanent	no	no	cloudy	total	yes	no	mixed	3	zero	4.2	zero	20	3.9	29.2	235	0.834	0.704	0.318	0.773	0.661	0.285	0.834	0.708	0.344	0.857	0.721	0.35	131.389	36.5976	0	39.4955	0	68.1396	2.04611	66.4077	5.63967	27.3739
lup-17	icemr3_julaug2016	lup	dry	2016-07-07	natural	no	yes	no	no	no	no	temporal	no	no	clear	partial	no	yes	mixed	2	zero	4.9	non-zero	19	3.3	31	390	0.877	0.728	0.381	0.871	0.723	0.37	0.845	0.714	0.343	0.857	0.725	0.357	0	33.2401	0	54.3567	0.272109	70.4192	2.0926	69.7465	5.41369	31.2441
lup-2	icemr3_julaug2016	lup	dry	2016-07-04	natural	yes	yes	yes	no	yes	no	temporal	no	no	clear	total	yes	yes	sand	3	zero	4.8	non-zero	35.1	5.3	29	198	0.612	0.58	0.175	0.737	0.663	0.26	0.812	0.701	0.33	0.85	0.728	0.369	39.5701	23.6354	47.1306	46.1424	27.5902	62.4045	7.164	64.0166	3.67339	61.7254
lup-22	icemr3_julaug2016	lup	dry	2016-07-07	natural	no	yes	yes	no	yes	no	temporal	no	no	clear	total	yes	no	mixed	3	zero	4.3	non-zero	31	4	29.9	210	0.286	0.445	0.334	0.253	0.393	0.488	0.313	0.473	0.423	0.636	0.589	0.404	18.773	60.9333	0	40.2105	0	23.9493	13.6793	46.8713	1.94554	889.919
lup-3	icemr3_julaug2016	lup	dry	2016-07-04	natural	yes	yes	yes	no	yes	no	permanent	no	no	cloudy	partial	yes	no	organic material	3	zero	6.1	zero	61.3	2.2	28.4	620	0.612	0.58	0.175	0.735	0.662	0.249	0.804	0.701	0.323	0.85	0.728	0.369	30.3274	25.7889	31.6017	45.4871	24.8877	60.902	7.22441	64.0393	3.6713	48.5955
lup-4	icemr3_julaug2016	lup	dry	2016-07-04	natural	yes	no	yes	no	yes	no	permanent	no	no	clear	total	yes	no	organic material	4	zero	5.9	zero	58	4.6	28.6	448	0.86	0.711	0.338	0.815	0.704	0.331	0.822	0.701	0.331	0.838	0.721	0.354	0	45.4397	0	38.6322	0	56.2843	5.42575	67.6289	3.82439	26.2399
lup-5	icemr3_julaug2016	lup	dry	2016-07-04	natural	yes	no	yes	no	yes	no	temporal	no	no	clear	total	no	no	organic material	4	zero	4.2	non-zero	47	5.5	30	450	0.833	0.707	0.335	0.824	0.707	0.321	0.83	0.709	0.343	0.834	0.721	0.354	0	49.5904	31.934	50.7245	23.5107	63.5244	5.34472	69.5625	4.16463	67.0832
lup-7	icemr3_julaug2016	lup	dry	2016-07-05	natural	yes	no	yes	no	yes	no	permanent	no	no	clear	partial	yes	no	sand	5	zero	6.1	zero	25	3.9	30.4	350	0.841	0.718	0.318	0.817	0.708	0.333	0.822	0.709	0.334	0.838	0.721	0.357	0	79.673	0	56.7464	0	62.5768	5.1481	68.3465	4.29285	59.4811
lup-8	icemr3_julaug2016	lup	dry	2016-07-05	natural	no	yes	yes	yes	yes	no	permanent	no	no	cloudy	total	yes	no	sand	7	zero	4.1	non-zero	37.2	5.2	28.9	560	0.852	0.731	0.367	0.815	0.706	0.323	0.822	0.705	0.334	0.834	0.721	0.354	0	47.2737	0	41.5087	1.06289	59.4867	4.02102	68.1774	4.0884	41.0474
lup-9	icemr3_julaug2016	lup	dry	2016-07-05	natural							permanent			cloudy	partial	yes	yes	organic material	5	zero	5.5	zero	44.3	4.8	28.5	480	0.852	0.733	0.373	0.812	0.702	0.323	0.823	0.705	0.334	0.834	0.721	0.354	0	51.9388	0	36.2344	19.8085	59.607	4.41036	69.0233	4.08629	29.7939
nho-1	icemr3_julaug2016	nho	dry	2016-07-23	artificial	yes	yes	yes	no	yes	no	permanent	no	no	cloudy	none	yes	yes	mixed	5	zero	4.6	zero	33.9	5.2	28.7	620	0.599	0.341	0.255	0.594	0.373	0.253	0.693	0.592	0.343	0.7	0.597	0.369	20.8233	37.8747	0	53.5162	0	49.4871	0	51.807	4.32224	157.549
nho-10	icemr3_julaug2016	nho	dry	2016-07-24	artificial							permanent	no	no	clear	none	yes	yes	mud	2	zero	6.1	non-zero	27.2	2.1	28.4	283	0.777	0.667	0.371	0.616	0.621	0.409	0.46	0.491	0.397	0.581	0.551	0.4	18.8339	62.035	0	55.3863	0	41.2571	0.426239	54.1843	2.64268	336.319
nho-11	icemr3_julaug2016	nho	dry	2016-07-24	natural							permanent	no	no	cloudy	none	no	no	mud	2	zero	5.9	zero	32.1	3.2	29.9	229	0.504	0.51	0.316	0.683	0.628	0.316	0.655	0.564	0.323	0.685	0.597	0.381	28.6406	13.8904	0	40.6327	0	44.6617	0	50.249	4.33967	195.89
nho-12	icemr3_julaug2016	nho	dry	2016-07-24	natural	no	yes	yes	no	no	no	permanent	no	no	cloudy		yes	no	sand	3	zero	3.4	non-zero	49.6	3.3	29.4	510	0.923	0.765	0.421	0.876	0.747	0.386	0.739	0.668	0.354	0.652	0.598	0.365	0	92.1739	0	72.589	0	49.7323	0	45.8531	2.25173	294.252
nho-13	icemr3_julaug2016	nho	dry	2016-07-24	natural							permanent	no	no	clear	none	no	no	mud	4	zero	4.9	zero	199	4.1	29.4	698	0.553	0.388	0.238	0.56	0.422	0.254	0.646	0.55	0.268	0.738	0.652	0.365	71.1793	31.9498	0	38.8916	0	37.7334	0.275197	48.8084	3.87586	84.3107
nho-2	icemr3_julaug2016	nho	dry	2016-07-23	artificial	yes	no	yes	no	yes	no	permanent	no	no	clear		yes	no	mud	5	zero	5.1	zero	32.4	5.3	28.9	750	0.535	0.162	0.194	0.487	0.147	0.195	0.41	0.151	0.195	0.457	0.376	0.295	94.3748	0	0	3.4001	0	18.8026	0	46.2991	0.250353	1200.52
nho-3	icemr3_julaug2016	nho	dry	2016-07-23	artificial	no	yes	yes	no	yes	no	permanent			cloudy	partial	yes	no	mixed	4	zero	5.1	non-zero	47.2	6.1	29.1	510	0.771	0.68	0.287	0.771	0.688	0.322	0.692	0.613	0.295	0.707	0.629	0.365	10.6727	90.0272	0	57.4613	0	45.4375	0.903856	47.6389	0.924003	190.414
nho-4	icemr3_julaug2016	nho	dry	2016-07-23	artificial	yes	yes	yes	no	yes	no	temporal	no	no	cloudy	none			mixed	5	zero	3.9	zero	38.1	4.8	29	180	0.193	0.355	0.487	0.568	0.634	0.421	0.489	0.56	0.404	0.465	0.508	0.416	19.9764	73.627	0	50.4644	0	35.0261	1.08662	56.3844	1.96334	422.64
nho-5	icemr3_julaug2016	nho	dry	2016-07-23	artificial	yes	yes	yes	no	yes	no	permanent	no	no	cloudy	total	yes	yes	mud	2	zero	5.2	zero	12.9	3.3	29.3	250	0.136	0.273	0.417	0.15	0.3	0.417	0.349	0.499	0.411	0.503	0.52	0.416	0	19.9021	0	50.1671	0	35.6378	1.89346	57.1696	2.33831	405.538
nho-6	icemr3_julaug2016	nho	dry	2016-07-24	artificial	yes	yes	yes	no	yes	no	permanent			cloudy	partial	yes	no	sand	4	zero	4.8	zero	34.3	3.5	29.2	120	0.58	0.596	0.383	0.639	0.627	0.378	0.755	0.683	0.378	0.545	0.559	0.404	2.1057	11.2806	0	27.633	0	42.4148	0.209901	49.3417	0.926062	441.403
nho-7	icemr3_julaug2016	nho	dry	2016-07-24	artificial	no	yes	yes	no	yes	no	permanent	no	no	cloudy	partial	yes	no	mixed	3	zero	4	non-zero	30.1	2	30.1	98	0.629	0.619	0.317	0.647	0.645	0.403	0.489	0.56	0.417	0.441	0.512	0.425	34.5891	5.16304	0	20.6312	0	43.7988	1.07098	52.9887	1.46178	520.37
nho-8	icemr3_julaug2016	nho	dry	2016-07-24	artificial	no	no	yes	no	yes	no	permanent	no	no	cloudy	total	yes	no	mixed	5	zero	5.1	non-zero	27.9	6.2	30.1	575	0.599	0.619	0.329	0.705	0.633	0.337	0.755	0.699	0.396	0.62	0.59	0.389	52.8106	66.6667	0	37.5758	0	45.3351	0	46.4601	2.02529	477.24
nho-9	icemr3_julaug2016	nho	dry	2016-07-24	artificial	yes	yes	yes	no	yes	no	permanent	no	no	cloudy	total	yes	yes	mixed	5	zero	4.9	zero	41.1	4.2	28.9	201	0.211	0.376	0.462	0.29	0.4	0.449	0.334	0.467	0.425	0.674	0.597	0.408	32.0659	20.327	0	93.2237	0	54.6926	1.08232	57.3777	3.01023	364.061
sem-1	icemr3_julaug2016	sem	dry	2016-07-19	natural	yes	yes	yes	no	yes	no	permanent	no	no	clear	partial	yes	yes	mixed	7	zero	4.9	zero	48.2	3.2	30	350	0.681	0.598	0.466667	0.668333	0.591	0.457333	0.658333	0.589	0.447333	0.609667	0.551667	0.430667		93.2425	0	78.8946	1.40606	52.9275	9.86352	83.1854	1.78329	72.6341
sem-2	icemr3_julaug2016	sem	dry	2016-07-19	natural	yes	yes	no	no	yes	no	permanent	no	no	cloudy	partial			mixed	7	zero	5.3	zero	29.5	3.2	28.1	680	0.491667	0.356333	0.342333	0.557	0.414	0.368667	0.579333	0.448667	0.392333	0.590333	0.501	0.406333		86.6232	0	76.5789	0	77.5338	0	82.6473	0	52.8547
sem-3	icemr3_julaug2016	sem	dry	2016-07-19	natural							temporal	no	no	clear	none				1	zero	6.2	non-zero	31.2	3.9	28.3	910	0.446333	0.319667	0.325	0.547	0.383	0.342	0.585	0.444333	0.382333	0.599	0.51	0.409667		21.6776	0	55.0744	0	74.8331	0	81.332	1.02623	22.4392
tri-1	icemr3_julaug2016	tri	dry	2016-08-07	artificial	no	no	yes	no	yes	no	permanent	no	no	cloudy	partial	yes	yes	mixed	2	zero	4.7	zero	22.4	4.2	29.2	410	0.729	0.705	0.316	0.825	0.71	0.348	0.869	0.755	0.38	0.816	0.731	0.38	42.9547	27.8804	0	45.8704	0	37.5177	10.4345	45.6664	7.49725	232.351
tri-10	icemr3_julaug2016	tri	dry	2016-08-08	natural	yes	yes	no	no	no	no	permanent	no	no	clear	none	yes	yes	mixed	2	zero	6.2	non-zero	31.5	4.8	29	340	0.774	0.612	0.407	0.684	0.614	0.363	0.76	0.628	0.335	0.754	0.621	0.311	23.3061	90.7256	0	76.5921	0	38.1507	0	42.01	0.27579	204.923
tri-11	icemr3_julaug2016	tri	dry	2016-08-08	natural	no	no	yes	no	no	yes	temporal	no	no	clear	none	no	no	mixed	1	zero	3.9	non-zero	37.7	4.9	28.7	290	0.862	0.749	0.391	0.848	0.748	0.372	0.872	0.761	0.392	0.863	0.762	0.404	13.2654	66.0879	0	67.0869	0	48.9359	0	48.7636	1.19812	338.059
tri-12	icemr3_julaug2016	tri	dry	2016-08-08	artificial	yes	no	no	no	yes	no	temporal	no	no	cloudy	partial	yes	yes	mixed	3	zero	4.8	non-zero	41.2	4.8	29.2	310	0.928	0.782	0.407	0.892	0.776	0.406	0.864	0.753	0.385	0.863	0.762	0.4	0	77.0403	0	75.6436	0	55.0889	0	45.0466	0.513227	288.26
tri-13	icemr3_julaug2016	tri	dry	2016-08-08	natural	yes	no	yes	no	no	yes	temporal	no	no	cloudy	partial	yes	no	mud	2	zero	4.1	zero	40.9	5.1	29.1	410	0.782	0.662	0.312	0.764	0.654	0.294	0.825	0.696	0.339	0.761	0.676	0.353	65.2565	0	0	2.21535	0	32.8618	0.646359	36.7698	3.35888	104.28
tri-14	icemr3_julaug2016	tri	dry	2016-08-08	artificial	yes	yes	no	no	yes	no	temporal	no	no	clear	none	yes	yes	mixed	2	zero	5.4	zero	32.2	4.1	29.1	420	0.856	0.75	0.398	0.704	0.672	0.39	0.808	0.684	0.353	0.777	0.652	0.33	60.0662	37.7451	0	49.3685	0	36.1161	0	38.792	0.72405	165.829
tri-15	icemr3_julaug2016	tri	dry	2016-08-08	natural	yes	no	yes	no	no	no	temporal	no	no	cloudy	none	no	no	mixed	1	zero	5.1	non-zero	27.1	5.2	28.9	310	0.813	0.717	0.347	0.832	0.742	0.353	0.841	0.73	0.369	0.855	0.747	0.377	0	2.84308	0	35.0049	0	53.8946	0.329885	39.6177	0.583082	174.159
tri-2	icemr3_julaug2016	tri	dry	2016-08-07	natural	no	no	yes	no	no	no	temporal	no	no	cloudy	total	yes	no	sand	3	zero	4.2	non-zero	32.8	4.3	30	320	0.924	0.764	0.373	0.86	0.74	0.351	0.839	0.738	0.368	0.807	0.706	0.369	12.7301	70.1954	0	58.651	0	29.2412	5.54089	43.2829	5.16487	157.79
tri-3	icemr3_julaug2016	tri	dry	2016-08-07	artificial	yes	no	yes	no	yes	yes	permanent	no	no	clear	partial	yes	yes		4	zero	5.3	zero	51.4	6.1	28.1	450	0.92	0.778	0.407	0.883	0.771	0.403	0.864	0.747	0.377	0.863	0.754	0.392	0	69.8913	0	62.8893	0	55.575	0	43.4346	0.532124	257.254
tri-4	icemr3_julaug2016	tri	dry	2016-08-08	artificial	no	no	yes	no	yes	no	permanent	no	no	cloudy	partial	yes	yes	mixed	5	zero	5.1	non-zero	32.8	4.3	30	320	0.893	0.771	0.415	0.902	0.775	0.407	0.873	0.752	0.377	0.863	0.754	0.389	10.9069	71.926	0	62.8419	0	57.4192	1.62492	41.4832	0.557047	211.119
tri-5	icemr3_julaug2016	tri	dry	2016-08-08	natural	no	yes	yes	no	yes	no	permanent	no	no	cloudy	partial	yes	yes	sand	4	zero	6.9	zero	45.9	4.3	28.5	350	0.482	0.463	0.215	0.634	0.573	0.25	0.697	0.59	0.282	0.816	0.684	0.342	80.8708	0	0	5.76162	0	38.383	0	41.5828	0.555699	112.306
tri-8	icemr3_julaug2016	tri	dry	2016-08-08	natural	no	yes	no	no	yes	no	permanent	no	no	cloudy	partial	yes	yes	mixed	2	zero	5.1	zero	22	5.2	28.7	560	0.682	0.614	0.372	0.682	0.596	0.305	0.755	0.637	0.339	0.808	0.676	0.338	16.8469	43.5493	0	36.8233	0	36.3344	0	44.0361	0.410094	88.7237
tri-9	icemr3_julaug2016	tri	dry	2016-08-08	natural	no	yes	no	no	yes	yes	permanent	no	no	cloudy	partial	yes	no	sand	4	zero	5.8	non-zero	32.8	5.7	29.1	230	0.532	0.564	0.368	0.687	0.633	0.368	0.824	0.715	0.369	0.848	0.73	0.365	65.4111	27.8384	0	37.8091	0	41.9026	0	40.1122	3.26441	66.5192
lup-1	icemr4_sepoct2016	lup	dry	2016-10-06	natural	yes	yes	no	no	yes	no	permanent			clear	total	yes	yes	sand	2	zero	4.7	zero	33.1	5.3	29	180	0.591667	0.382	0.194667	0.599	0.388	0.210667	0.604	0.403333	0.225	0.617333	0.419333	0.229667	6.78142	14.7139	69.3182	45.4162	34.0885	63.9814	8.12818	63.1254	3.72408	85.6231
lup-13	icemr4_sepoct2016	lup	dry	2016-10-07	natural	no	no	yes	yes	yes	no	temporal	no	no	cloudy	partial	no	no	sand	2	zero	4.2	non-zero	59	3.2	28.7	850	0.615	0.369	0.208	0.605333	0.393667	0.216	0.603667	0.401	0.223333	0.619333	0.419333	0.229667	0	25.9924	0	52.7613	4.03154	56.8182	7.69185	63.8871	3.68115	28.401
lup-15	icemr4_sepoct2016	lup	dry	2016-10-07	artificial	yes	yes	no	no	no	no	permanent	no	no	cloudy	total	yes	no	mixed	3	non-zero	3.2	non-zero	77	3.7	29.2	1020	0.597	0.432667	0.200333	0.588667	0.420333	0.193333	0.643	0.447667	0.232	0.646	0.447333	0.241	131.389	36.5976	0	39.4955	0	68.1396	2.04611	66.4077	5.63967	27.3739
lup-17	icemr4_sepoct2016	lup	dry	2016-10-07	natural	no	yes	no	no	no	no	temporal	no	no	clear	partial	yes	no	sand	2	zero	4.8	non-zero	22	4.4	29.9	56	0.635667	0.455667	0.259	0.625333	0.455	0.242	0.642667	0.448	0.234333	0.644333	0.448333	0.243333	0	33.2401	0	54.3567	0.272109	70.4192	2.0926	69.7465	5.41369	31.2441
lup-2	icemr4_sepoct2016	lup	dry	2016-10-06	natural	yes	yes	no	no	yes	no	temporal	no	no	clear	total	yes	yes	sand	5	zero	4.7	zero	33.1	5.3	29	180	0.590333	0.386	0.213667	0.587667	0.382333	0.208333	0.598333	0.397667	0.225667	0.619333	0.419333	0.23	39.5701	23.6354	47.1306	46.1424	27.5902	62.4045	7.164	64.0166	3.67339	61.7254
lup-3	icemr4_sepoct2016	lup	dry	2016-10-06	natural	yes	no	yes	no	yes	no	permanent	no	no	cloudy	partial	no	no	organic material	3	zero	5.8	non-zero	58	2.8	29	320	0.600333	0.385667	0.216333	0.588333	0.382667	0.208333	0.597333	0.397667	0.225	0.618667	0.419667	0.229	30.3274	25.7889	31.6017	45.4871	24.8877	60.902	7.22441	64.0393	3.6713	48.5955
lup-4	icemr4_sepoct2016	lup	dry	2016-10-06	natural							permanent	no	no	clear	total	yes	no	organic material	4	zero	6.9	non-zero	42.4	4.5	27.5	435	0.64	0.423	0.239333	0.619	0.41	0.228	0.61	0.408667	0.227333	0.626	0.426	0.233333	0	45.4397	0	38.6322	0	56.2843	5.42575	67.6289	3.82439	26.2399
lup-5	icemr4_sepoct2016	lup	dry	2016-10-06	natural	yes	no	yes	no	yes	no	temporal	no	no	clear	total	yes	yes	sand	2	zero	4.3	non-zero	39.9	4.9	29	390	0.641667	0.427667	0.226	0.636667	0.427667	0.221333	0.627	0.426333	0.234667	0.627	0.431667	0.236667	0	49.5904	31.934	50.7245	23.5107	63.5244	5.34472	69.5625	4.16463	67.0832
lup-6	icemr4_sepoct2016	lup	dry	2016-10-06	natural	yes	no	yes	no	yes	no	temporal	no	no	clear	partial	yes	no	mud	5	zero	5.2	zero	31.5	4.4	28.3	270	0.621667	0.386	0.212333	0.548	0.375333	0.210667	0.586333	0.394667	0.224667	0.621333	0.421333	0.230667	10.1504	85.5356	0	45.6987	5.08997	55.1153	7.92541	65.6642	3.63595	29.4152
lup-7	icemr4_sepoct2016	lup	dry	2016-10-06	natural	yes	no	yes	no	yes	yes	permanent	no	no	clear	partial	no	no	mixed	5	zero	6.1	non-zero	24.3	4.1	30.4	310	0.631	0.410667	0.222333	0.616333	0.407333	0.225	0.611	0.412	0.227667	0.626333	0.425333	0.233333	0	79.673	0	56.7464	0	62.5768	5.1481	68.3465	4.29285	59.4811
lup-8	icemr4_sepoct2016	lup	dry	2016-10-06	natural	no	yes	yes	yes	yes	no	permanent	no	no	cloudy	total	no	no	sand	5	zero	4	zero	39.3	4.8	29	479	0.657667	0.435	0.248333	0.627	0.420667	0.223333	0.619333	0.416333	0.23	0.626333	0.428	0.234667	0	47.2737	0	41.5087	1.06289	59.4867	4.02102	68.1774	4.0884	41.0474
lup-9	icemr4_sepoct2016	lup	dry	2016-10-07	natural	yes	yes	yes	no	yes	no	permanent	no	no	cloudy	partial	yes	yes	organic material	5	zero	5.1	zero	42.4	4.2	28.4	299	0.635	0.435333	0.250667	0.632	0.423333	0.221667	0.622333	0.422333	0.231333	0.627667	0.429667	0.236	0	51.9388	0	36.2344	19.8085	59.607	4.41036	69.0233	4.08629	29.7939
nho-1	icemr4_sepoct2016	nho	dry	2016-10-19	artificial	yes	yes	yes	no	yes	no	permanent			clear	partial	yes	no		4	zero	4.7	zero	39.8	5.4	29.2	520	0.411	0.218333	0.238	0.527333	0.313667	0.229333	0.560667	0.346667	0.211667	0.568333	0.359667	0.213	20.8233	37.8747	0	53.5162	0	49.4871	0	51.807	4.32224	157.549
nho-10	icemr4_sepoct2016	nho	dry	2016-10-22	artificial	no	no	yes	no	no	no	permanent	no	no	clear	partial	yes	yes	mud	2	zero	6.2	non-zero	31.2	3.2	28.4	320	0.533333	0.325	0.146333	0.522	0.327667	0.167	0.528667	0.331667	0.195333	0.559333	0.351667	0.206333	18.8339	62.035	0	55.3863	0	41.2571	0.426239	54.1843	2.64268	336.319
nho-11	icemr4_sepoct2016	nho	dry	2016-10-22	natural	yes	no	yes	no	no	no	permanent	no	no	cloudy	none	no	no	mud	3	zero	6.1	non-zero	33.4	3.1	29.4	230	0.536333	0.311667	0.198667	0.520667	0.295667	0.207	0.536667	0.332	0.201	0.557	0.352333	0.209	28.6406	13.8904	0	40.6327	0	44.6617	0	50.249	4.33967	195.89
nho-12	icemr4_sepoct2016	nho	dry	2016-10-22	natural	no	yes	yes	no	no	no	permanent	no	no	cloudy	partial	yes	no	sand	3	zero	4.9	zero	12.7	4.1	29.2	480	0.513333	0.349	0.223	0.502333	0.338333	0.215333	0.503667	0.311333	0.189	0.524333	0.323	0.185667	0	92.1739	0	72.589	0	49.7323	0	45.8531	2.25173	294.252
nho-13	icemr4_sepoct2016	nho	dry	2016-10-22	natural							permanent	no	no	clear	none	no	no	mud	4	zero	3.9	zero	178	4.9	29.1	590	0.402333	0.245333	0.175667	0.440333	0.264667	0.176333	0.503333	0.306667	0.181333	0.546667	0.338667	0.203	71.1793	31.9498	0	38.8916	0	37.7334	0.275197	48.8084	3.87586	84.3107
nho-2	icemr4_sepoct2016	nho	dry	2016-10-19	artificial	yes	no	yes	no	yes	no	permanent	no	no	clear	partial	yes	no	mud	4	zero	4.9	zero	29.8	5.3	28.9	410	0.532333	0.316	0.168	0.533	0.315333	0.157333	0.519333	0.309667	0.151	0.546333	0.337	0.173333	94.3748	0	0	3.4001	0	18.8026	0	46.2991	0.250353	1200.52
nho-3	icemr4_sepoct2016	nho	dry	2016-10-19	artificial	no	yes	yes	no	no	no	permanent	no	no	cloudy	partial	yes	no	mixed	5	zero	5.3	zero	52.1	5.9	29.1	380	0.562333	0.348333	0.207667	0.543	0.335667	0.201	0.498	0.300333	0.174333	0.531333	0.33	0.194667	10.6727	90.0272	0	57.4613	0	45.4375	0.903856	47.6389	0.924003	190.414
nho-5	icemr4_sepoct2016	nho	dry	2016-10-20	artificial	yes	yes	yes	no	yes	no	permanent	no	no	cloudy	total	yes	no	mud	1	zero	5.3	non-zero	12.5	4.2	28.9	310	0.49	0.326667	0.182	0.502667	0.326	0.187667	0.524333	0.331333	0.183667	0.556	0.35	0.205	0	19.9021	0	50.1671	0	35.6378	1.89346	57.1696	2.33831	405.538
nho-6	icemr4_sepoct2016	nho	dry	2016-10-20	artificial	yes	yes	yes	no	yes	no	permanent	no	no	cloudy	partial	yes	no	sand	2.5	zero	3.2	zero	33.2	3.7	29.2	165	0.557	0.346	0.217667	0.542	0.336333	0.205667	0.533333	0.334667	0.202333	0.529667	0.327333	0.19	2.1057	11.2806	0	27.633	0	42.4148	0.209901	49.3417	0.926062	441.403
nho-7	icemr4_sepoct2016	nho	dry	2016-10-20	artificial	no	yes	yes	no	yes	no	permanent	no	no	cloudy	none	yes	no	mixed	3	zero	4.1	non-zero	49	4	31.2	149	0.484667	0.330667	0.192	0.517667	0.349333	0.196	0.52	0.332333	0.19	0.539333	0.337	0.195667	34.5891	5.16304	0	20.6312	0	43.7988	1.07098	52.9887	1.46178	520.37
nho-8	icemr4_sepoct2016	nho	dry	2016-10-20	artificial	no	no	yes	no	yes	no	permanent	no	no	clear	total	yes	no		4	zero	5.9	non-zero	51.1	12.2	31.1	318	0.423667	0.302	0.177667	0.443667	0.301	0.187333	0.507	0.316667	0.199667	0.529	0.325333	0.188	52.8106	66.6667	0	37.5758	0	45.3351	0	46.4601	2.02529	477.24
nho-9	icemr4_sepoct2016	nho	dry	2016-10-21	artificial	yes	yes	yes	no	yes	no	permanent	no	no	cloudy	total	yes	yes	mixed	5	zero	6.1	zero	76.2	5.9	29.3	210	0.455333	0.288	0.162667	0.541	0.340333	0.174333	0.574667	0.362667	0.211	0.576333	0.367333	0.216667	32.0659	20.327	0	93.2237	0	54.6926	1.08232	57.3777	3.01023	364.061
sem-1	icemr4_sepoct2016	sem	dry	2016-09-20	natural	yes	yes	yes	no	yes	yes	permanent			clear	partial	yes	yes	mixed	7	zero	5.1	zero	51.2	3.7	29.8	377	0.503	0.324667	0.252667	0.502333	0.323667	0.245333	0.508	0.334333	0.238667	0.528	0.363667	0.254667		93.2425	0	78.8946	1.40606	52.9275	9.86352	83.1854	1.78329	72.6341
sem-2	icemr4_sepoct2016	sem	dry	2016-09-22	natural	no	yes	no	no	yes	no	permanent	no	no	cloudy	partial	yes	yes	mixed	7	zero	4.9	zero	29.5	2.9	27.1	720	0.447667	0.358333	0.236667	0.539	0.387667	0.252667	0.561667	0.399	0.263667	0.566	0.390333	0.259		86.6232	0	76.5789	0	77.5338	0	82.6473	0	52.8547
sem-3	icemr4_sepoct2016	sem	dry	2016-09-22	natural							temporal	no	no	clear	none			sand	6	zero	4.7	non-zero	39.3	3.7	27.1	814	0.437333	0.314667	0.228333	0.559333	0.391333	0.249	0.556333	0.392	0.256	0.560667	0.379333	0.256667		21.6776	0	55.0744	0	74.8331	0	81.332	1.02623	22.4392
tri-1	icemr4_sepoct2016	tri	dry	2016-10-11	artificial	no	no	yes	no	yes	no	permanent	no	no	clear	total	yes	no	mixed	3	zero	5.2	non-zero	24.1	4.5	28.3	410	0.571333	0.375667	0.172333	0.593	0.384	0.191667	0.644	0.400667	0.216667	0.642333	0.401667	0.223	42.9547	27.8804	0	45.8704	0	37.5177	10.4345	45.6664	7.49725	232.351
tri-10	icemr4_sepoct2016	tri	dry	2016-10-14	natural	yes	yes	no	no	no	no	permanent	no	no	cloudy	none	yes	no	mixed	5	zero	5.4	zero	30.1	5.2	28.9	340	0.693333	0.423333	0.283667	0.648	0.416333	0.258	0.660333	0.441333	0.248667	0.658667	0.430333	0.241667	23.3061	90.7256	0	76.5921	0	38.1507	0	42.01	0.27579	204.923
tri-11	icemr4_sepoct2016	tri	dry	2016-10-14	natural	no	no	yes	no	no	yes	temporal	no	no	clear	none	no	no	mixed	3	zero	4.1	non-zero	33.5	4.9	28.7	290	0.579	0.390333	0.217	0.601	0.398333	0.218333	0.644333	0.415333	0.23	0.640667	0.405333	0.234667	13.2654	66.0879	0	67.0869	0	48.9359	0	48.7636	1.19812	338.059
tri-12	icemr4_sepoct2016	tri	dry	2016-10-14	artificial	yes	no	no	no	yes	no	temporal	no	no	cloudy	partial	yes	yes	mixed	4	zero	4.7	zero	41.2	4.8	29.2	310	0.623667	0.417667	0.228333	0.619	0.416667	0.228333	0.642333	0.414333	0.226	0.642333	0.404333	0.234667	0	77.0403	0	75.6436	0	55.0889	0	45.0466	0.513227	288.26
tri-13	icemr4_sepoct2016	tri	dry	2016-10-14	natural	yes	no	yes	no	no	yes	temporal	no	no	cloudy	partial	yes	no	mud	3	zero	4.5	zero	41	5.1	29.1	410	0.624333	0.365667	0.179	0.619667	0.379667	0.189667	0.619	0.394667	0.206333	0.650667	0.415333	0.226333	65.2565	0	0	2.21535	0	32.8618	0.646359	36.7698	3.35888	104.28
tri-14	icemr4_sepoct2016	tri	dry	2016-10-14	artificial	yes	yes	no	no	yes	no	temporal	no	no	clear	none	yes	yes	mixed	4	zero	5.6	non-zero	39.4	4.9	29.1	420	0.641667	0.443	0.253333	0.623333	0.425333	0.249333	0.642	0.417	0.233667	0.652	0.42	0.231667	60.0662	37.7451	0	49.3685	0	36.1161	0	38.792	0.72405	165.829
tri-15	icemr4_sepoct2016	tri	dry	2016-10-14	natural	yes	no	yes	no	no	no	temporal	no	no	cloudy	none	no	no	mixed	3	zero	5.3	zero	28.7	5.2	28.8	310	0.614667	0.405	0.189333	0.625	0.423667	0.218667	0.633	0.417	0.223	0.641333	0.409333	0.231667	0	2.84308	0	35.0049	0	53.8946	0.329885	39.6177	0.583082	174.159
tri-2	icemr4_sepoct2016	tri	dry	2016-10-11	natural	no	no	yes	no	yes	no	temporal	no	no	cloudy	none	yes	no	mixed	4	zero	4.9	zero	31.4	5.1	29.1	450	0.641333	0.409333	0.211333	0.632333	0.401333	0.215667	0.622	0.389333	0.208333	0.644333	0.404	0.222333	12.7301	70.1954	0	58.651	0	29.2412	5.54089	43.2829	5.16487	157.79
tri-3	icemr4_sepoct2016	tri	dry	2016-10-12	artificial	no	no	yes	no	yes	no	permanent	no	no	clear	partial	yes	no	mixed	4	zero	5	non-zero	49.2	5.3	29.3	450	0.645333	0.425667	0.235	0.621333	0.419667	0.230667	0.639	0.415333	0.226667	0.643333	0.406333	0.233667	0	69.8913	0	62.8893	0	55.575	0	43.4346	0.532124	257.254
tri-4	icemr4_sepoct2016	tri	dry	2016-10-12	artificial	no	yes	yes	no	yes	no	permanent	no	no	cloudy	partial	yes	yes	mixed	4	zero	4.9	zero	38.9	4.8	28.9	320	0.635333	0.436333	0.234333	0.659333	0.448667	0.236333	0.64	0.418	0.229667	0.633	0.404333	0.233333	10.9069	71.926	0	62.8419	0	57.4192	1.62492	41.4832	0.557047	211.119
tri-5	icemr4_sepoct2016	tri	dry	2016-10-12	natural	no	no	yes	no	yes	no	permanent	no	no	cloudy	partial	yes	no	sand	5	zero	5.1	zero	41.2	4.3	29	350	0.568333	0.354	0.195667	0.577	0.368333	0.186	0.625333	0.397333	0.220667	0.649333	0.425	0.236	80.8708	0	0	5.76162	0	38.383	0	41.5828	0.555699	112.306
tri-6	icemr4_sepoct2016	tri	dry	2016-10-13	artificial	no	no	yes	no	yes	no	temporal	no	no	cloudy	partial	yes	yes	mixed	4	zero	4.7	non-zero	47.3	4.9	28.5	310	0.649	0.436333	0.270667	0.648667	0.437333	0.267667	0.671333	0.441333	0.252333	0.665	0.434667	0.243333	27.6513	68.5558	0	60.5097	0	39.0935	0	39.7493	0.29148	194.919
tri-8	icemr4_sepoct2016	tri	dry	2016-10-13	natural	no	yes	no	no	yes	no	permanent	no	no	cloudy	partial	yes	yes	mixed	3	zero	4.9	zero	31.2	5.1	29.9	560	0.654333	0.395333	0.269	0.653333	0.396	0.232333	0.638	0.415	0.235333	0.654	0.423333	0.235667	16.8469	43.5493	0	36.8233	0	36.3344	0	44.0361	0.410094	88.7237
tri-9	icemr4_sepoct2016	tri	dry	2016-10-13	natural	yes	no	no	no	yes	yes	permanent	no	no	cloudy	partial	yes	no	sand	4	zero	5.1	zero	39.9	5	28.9	230	0.602333	0.399333	0.252	0.623	0.423	0.248333	0.646667	0.423	0.239	0.647667	0.412	0.226333	65.4111	27.8384	0	37.8091	0	41.9026	0	40.1122	3.26441	66.5192
lup-1	icemr5_novdec2016	lup	dry	2016-12-06	natural	yes	no	yes	no	yes	yes	permanent	no	no	clear	total	yes	no	sand	4	zero	5.1	zero	41.2	4.3	28.2	520	0.774	0.695	0.2925	0.784	0.703	0.3195	0.799	0.7185	0.342	0.8355	0.729	0.36	6.78142	14.7139	69.3182	45.4162	34.0885	63.9814	8.12818	63.1254	3.72408	85.6231
lup-15	icemr5_novdec2016	lup	dry	2016-12-08	artificial	yes	yes	no	no	no	yes	permanent	no	no	cloudy	partial	yes	no	mixed	4	non-zero	4.2	non-zero	79.2	3.8	29.2	890	0.7715	0.6475	0.248	0.7745	0.643	0.246	0.854	0.6995	0.3215	0.868	0.713	0.3265	131.389	36.5976	0	39.4955	0	68.1396	2.04611	66.4077	5.63967	27.3739
lup-17	icemr5_novdec2016	lup	dry	2016-12-09	natural	no	yes	no	no	no	no	temporal	no	no	cloudy	partial			sand	2	zero	4.9	zero	28.3	5.1	28.2	458	0.8755	0.7265	0.377	0.847	0.7145	0.348	0.8595	0.708	0.3315	0.883	0.7205	0.3435	0	33.2401	0	54.3567	0.272109	70.4192	2.0926	69.7465	5.41369	31.2441
lup-24	icemr5_novdec2016	lup	dry	2016-12-09	natural	no	yes	yes	yes	yes	no	temporal	no	no	cloudy	total	no	no	sand	4	non-zero	4.4	non-zero	42	4.2	29	520	0.878	0.727	0.318	0.8695	0.729	0.334	0.8285	0.7145	0.338	0.865	0.7305	0.36	0	76.1308	10.9056	84.0788	8.92498	63.2345	7.37479	68.8418	3.00217	93.8519
lup-3	icemr5_novdec2016	lup	dry	2016-12-06	natural	yes	no	yes	no	yes	no	permanent	no	no	cloudy	total	yes	yes	organic material	2	zero	5.2	non-zero	55.3	3.2	27.1	380	0.837	0.6895	0.3235	0.7965	0.698	0.3175	0.8105	0.716	0.338	0.8425	0.7285	0.357	30.3274	25.7889	31.6017	45.4871	24.8877	60.902	7.22441	64.0393	3.6713	48.5955
lup-4	icemr5_novdec2016	lup	dry	2016-12-06	natural	yes	no	yes	no	yes	no	permanent	no	no	cloudy	partial	yes	yes	organic material	4	zero	6.8	zero	44.8	4.5	25.1	429	0.8215	0.6965	0.319	0.849	0.7035	0.315	0.8745	0.727	0.3305	0.8715	0.7245	0.342	0	45.4397	0	38.6322	0	56.2843	5.42575	67.6289	3.82439	26.2399
lup-6	icemr5_novdec2016	lup	dry	2016-12-07	natural	yes	no	yes	no	yes	no	temporal	no	no	cloudy	total	yes	no	mud	6	zero	5.1	zero	32.7	4.3	27.2	354	0.841	0.6975	0.326	0.7655	0.6355	0.2785	0.8435	0.718	0.3355	0.859	0.7305	0.355	10.1504	85.5356	0	45.6987	5.08997	55.1153	7.92541	65.6642	3.63595	29.4152
lup-7	icemr5_novdec2016	lup	dry	2016-12-07	natural	yes	no	yes	no	yes	no	permanent	no	no	clear	total	no	no	mixed	5	zero	6	non-zero	24.3	4.1	29.3	320	0.854	0.718	0.3275	0.8575	0.717	0.3275	0.881	0.7305	0.3365	0.8735	0.7245	0.345	0	79.673	0	56.7464	0	62.5768	5.1481	68.3465	4.29285	59.4811
lup-8	icemr5_novdec2016	lup	dry	2016-12-07	natural	yes	no	yes	yes	yes	yes	permanent	no	no	cloudy		no	no	sand	4	zero	5.9	non-zero	39.3	4.5	29		0.889	0.737	0.346	0.84	0.7035	0.306	0.882	0.732	0.335	0.871	0.7245	0.3425	0	47.2737	0	41.5087	1.06289	59.4867	4.02102	68.1774	4.0884	41.0474
lup-9	icemr5_novdec2016	lup	dry	2016-12-07	natural	yes	yes	yes	yes	yes	no	permanent			clear	partial	yes	yes	organic material	5	zero	5.1	zero	42.4	4.2	27.9	288	0.883	0.7365	0.367	0.8365	0.702	0.307	0.8815	0.7305	0.3415	0.8725	0.7205	0.34	0	51.9388	0	36.2344	19.8085	59.607	4.41036	69.0233	4.08629	29.7939
nho-1	icemr5_novdec2016	nho	dry	2016-12-11	artificial	yes	yes	yes	no	yes	no	permanent			cloudy	partial	yes	yes	mixed	5	zero	4.5	zero	32.7	5.9	28.9	555	0.439	0.258	0.443	0.5255	0.3225	0.416	0.5225	0.3245	0.3945	0.4925	0.3085	0.3925	20.8233	37.8747	0	53.5162	0	49.4871	0	51.807	4.32224	157.549
nho-10	icemr5_novdec2016	nho	dry	2016-12-13	artificial	no	no	yes	no	no	no	permanent	no	no	clear	none	yes	yes	mud	2	zero	6.1	non-zero	32.2	4.3	28.4	280	0.515	0.3505	0.322	0.523	0.3555	0.365	0.52	0.346	0.4025	0.512	0.3295	0.394	18.8339	62.035	0	55.3863	0	41.2571	0.426239	54.1843	2.64268	336.319
nho-11	icemr5_novdec2016	nho	dry	2016-12-13	natural	yes	no	yes	no	no	no	permanent	no	no	clear	partial	no	no	mixed	4	zero	5.9	zero	32.1	3.9	28.9	240	0.424	0.3195	0.383	0.567	0.355	0.393	0.519	0.3355	0.3965	0.4965	0.3205	0.395	28.6406	13.8904	0	40.6327	0	44.6617	0	50.249	4.33967	195.89
nho-12	icemr5_novdec2016	nho	dry	2016-12-13	natural	no	yes	yes	no	no	no	permanent	no	no	cloudy	partial	yes	no	sand	3	zero	5.4	zero	15.5	3.7	28.3	410	0.583	0.3985	0.466	0.577	0.388	0.4385	0.524	0.362	0.411	0.5045	0.363	0.422	0	92.1739	0	72.589	0	49.7323	0	45.8531	2.25173	294.252
nho-13	icemr5_novdec2016	nho	dry	2016-12-13	natural	no	yes	yes	no	no	no	permanent	no	no	clear		yes	no	mud	4	zero	4.2	non-zero	77	5.2	29.1		0.274	0.241	0.359	0.349	0.2725	0.3895	0.477	0.3205	0.3915	0.512	0.3455	0.408	71.1793	31.9498	0	38.8916	0	37.7334	0.275197	48.8084	3.87586	84.3107
nho-2	icemr5_novdec2016	nho	dry	2016-12-11	artificial	no	no	yes	yes	yes	no	permanent	no	no	clear	partial	yes	yes	mud	4	zero	4.8	non-zero	29.8	5.3	27.2	610	0.448	0.3415	0.304	0.503	0.35	0.334	0.6125	0.3595	0.3535	0.6325	0.373	0.3765	94.3748	0	0	3.4001	0	18.8026	0	46.2991	0.250353	1200.52
nho-3	icemr5_novdec2016	nho	dry	2016-12-11	artificial	no	yes	yes	no	yes	no	permanent	no	no	cloudy	partial	yes	no	mixed	6	zero	4.9	zero	53.4	6.2	28.1	390	0.5865	0.391	0.4645	0.565	0.368	0.431	0.4845	0.3355	0.3945	0.5155	0.362	0.4185	10.6727	90.0272	0	57.4613	0	45.4375	0.903856	47.6389	0.924003	190.414
nho-5	icemr5_novdec2016	nho	dry	2016-12-12	artificial	yes	yes	yes	no	yes	no	permanent	no	no	cloudy	total	yes	yes			zero	5.3	non-zero	22.4	4.3	28.9	410	0.407	0.3225	0.395	0.488	0.3455	0.4035	0.52	0.348	0.3955	0.5235	0.3375	0.3955	0	19.9021	0	50.1671	0	35.6378	1.89346	57.1696	2.33831	405.538
nho-6	icemr5_novdec2016	nho	dry	2016-12-12	artificial	yes	yes	yes	no	yes	yes	permanent	no	no	clear	partial	yes	no	sand	4	zero	4.1	zero	35.1	4.2	28.9	250	0.629	0.3795	0.424	0.5815	0.365	0.427	0.526	0.371	0.4245	0.5315	0.371	0.4215	2.1057	11.2806	0	27.633	0	42.4148	0.209901	49.3417	0.926062	441.403
nho-7	icemr5_novdec2016	nho	dry	2016-12-12	artificial	no	yes	yes	no	yes	no	permanent	no	no	cloudy	total	yes	yes	mixed	3	zero	4.7	non-zero	47.7	4.9	30	280	0.7095	0.358	0.4115	0.6245	0.3755	0.412	0.535	0.363	0.4145	0.548	0.3635	0.4105	34.5891	5.16304	0	20.6312	0	43.7988	1.07098	52.9887	1.46178	520.37
nho-8	icemr5_novdec2016	nho	dry	2016-12-13	artificial	no	no	yes	no	yes	no	permanent	no	no	clear	total	yes	no	mixed	5	zero	5.5	non-zero	49.9	5.8	29.9	410	0.4625	0.3635	0.4295	0.472	0.3635	0.432	0.5115	0.372	0.4345	0.5235	0.376	0.4325	52.8106	66.6667	0	37.5758	0	45.3351	0	46.4601	2.02529	477.24
nho-9	icemr5_novdec2016	nho	dry	2016-12-13	artificial	yes	yes	yes	no	yes	yes	permanent	no	no	cloudy	partial	yes	yes	mixed	5	zero	5.4	zero	57.7	6.1	29.3	310	0.488	0.342	0.446	0.5335	0.3525	0.437	0.5085	0.3255	0.3965	0.5005	0.304	0.3895	32.0659	20.327	0	93.2237	0	54.6926	1.08232	57.3777	3.01023	364.061
sem-1	icemr5_novdec2016	sem	dry	2016-11-20	natural	yes	yes	yes	no	yes	yes	permanent	no	no	cloudy	partial	yes	yes	mixed	5	zero	5.1	non-zero	55.5	4.8	27.1	435	0.651	0.457667	0.350667	0.659667	0.460333	0.352667	0.631333	0.434667	0.319333	0.613	0.409333	0.288333		93.2425	0	78.8946	1.40606	52.9275	9.86352	83.1854	1.78329	72.6341
sem-2	icemr5_novdec2016	sem	dry	2016-11-22	natural	no	yes	no	no	yes	no	permanent	no	no	cloudy	partial	yes	no	mixed	7	zero	4.9	zero	38.1	3.2	28.2	720	0.478	0.298667	0.223667	0.528	0.330333	0.228333	0.567667	0.338333	0.234333	0.617667	0.384	0.262667		86.6232	0	76.5789	0	77.5338	0	82.6473	0	52.8547
sem-3	icemr5_novdec2016	sem	dry	2016-11-22	natural							temporal	no	no	clear	none			sand	6	zero	4.7	non-zero	40.2	3.7	28.1	852	0.564333	0.354333	0.243333	0.586	0.36	0.244333	0.578667	0.366333	0.248	0.613667	0.383667	0.262		21.6776	0	55.0744	0	74.8331	0	81.332	1.02623	22.4392
tri-1	icemr5_novdec2016	tri	dry	2016-11-27	artificial	no	no	yes	no	yes	no	permanent	no	no	cloudy	none	no	no		4	zero	5.7	zero	25.9	4.3	29	450	0.51	0.148	0.2745	0.462	0.1375	0.2665	0.4685	0.141	0.255	0.4665	0.207	0.279	42.9547	27.8804	0	45.8704	0	37.5177	10.4345	45.6664	7.49725	232.351
tri-10	icemr5_novdec2016	tri	dry	2016-11-30	natural	yes	no	no	no	no	no	permanent	no	no	clear	none	yes	yes	mixed	4	zero	5.4	zero	30.1	5.5	28.9	340	0.5375	0.258	0.2855	0.521	0.255	0.271	0.536	0.2575	0.2775	0.569	0.305	0.309	23.3061	90.7256	0	76.5921	0	38.1507	0	42.01	0.27579	204.923
tri-12	icemr5_novdec2016	tri	dry	2016-11-30	artificial	yes	no	no	no	yes	no	temporal	no	no	cloudy	partial	yes	yes	mixed	5	zero	4.7	zero	41.2	4.8	28.2	428	0.692	0.4385	0.3625	0.6825	0.4155	0.3545	0.6085	0.3835	0.3525	0.478	0.32	0.348	0	77.0403	0	75.6436	0	55.0889	0	45.0466	0.513227	288.26
tri-13	icemr5_novdec2016	tri	dry	2016-11-30	natural	yes	no	yes	no	no	yes	temporal	no	no	cloudy	total	yes	no	mud	4	zero	4.9	non-zero	43.4	4.9	29.1	410	0.449	0.1255	0.2525	0.4595	0.138	0.256	0.486	0.169	0.271	0.5065	0.225	0.2835	65.2565	0	0	2.21535	0	32.8618	0.646359	36.7698	3.35888	104.28
tri-14	icemr5_novdec2016	tri	dry	2016-11-30	artificial	yes	yes	no	no	yes	no	temporal	no	no	clear	partial	yes	yes	mixed	4	zero	5.3	zero	39.4	4.8	29.1	819	0.491	0.179	0.2885	0.4755	0.171	0.27	0.5	0.2135	0.2705	0.5375	0.271	0.2965	60.0662	37.7451	0	49.3685	0	36.1161	0	38.792	0.72405	165.829
tri-15	icemr5_novdec2016	tri	dry	2016-11-30	natural	yes	yes	no	no	yes	no	temporal	no	no	clear	partial	yes	yes	mixed	4	zero	5.3	zero	39.4	5.3	29.3	553	0.651	0.404	0.312	0.6665	0.407	0.3265	0.6155	0.384	0.338	0.484	0.324	0.34	0	2.84308	0	35.0049	0	53.8946	0.329885	39.6177	0.583082	174.159
tri-2	icemr5_novdec2016	tri	dry	2016-11-27	natural	no	no	yes	no	yes	no	temporal	no	no	cloudy	partial	yes	yes	sand	4	zero	4.9	zero	32.8	5.2	28	410	0.4645	0.1335	0.2605	0.458	0.1395	0.2565	0.469	0.1475	0.2635	0.4805	0.2175	0.2815	12.7301	70.1954	0	58.651	0	29.2412	5.54089	43.2829	5.16487	157.79
tri-3	icemr5_novdec2016	tri	dry	2016-11-27	artificial	no	no	no	no	yes	no	permanent	no	no	cloudy	total	yes	yes	mixed	5	zero	4.9	zero	49.2	6.7	26.7	390	0.6895	0.4385	0.3625	0.6855	0.42	0.3515	0.616	0.3885	0.35	0.477	0.32	0.3425	0	69.8913	0	62.8893	0	55.575	0	43.4346	0.532124	257.254
tri-4	icemr5_novdec2016	tri	dry	2016-11-28	artificial	yes	no	yes	yes	yes	no	permanent	no	no	cloudy	total	yes	yes	mixed	4	zero	5.1	zero	37.1	6.1	27.7		0.7085	0.421	0.362	0.7125	0.4245	0.365	0.6395	0.3955	0.3605	0.481	0.327	0.3515	10.9069	71.926	0	62.8419	0	57.4192	1.62492	41.4832	0.557047	211.119
tri-5	icemr5_novdec2016	tri	dry	2016-11-29	natural	no	no	yes	no	yes	no	permanent	no	no	clear	partial	yes	yes	sand	5	zero	5.1	zero	44.5	4.9	29.9	350	0.434	0.2375	0.2315	0.531	0.285	0.2415	0.55	0.3145	0.285	0.543	0.3155	0.3205	80.8708	0	0	5.76162	0	38.383	0	41.5828	0.555699	112.306
tri-8	icemr5_novdec2016	tri	dry	2016-11-30	natural	yes	no	no	no	yes	yes	permanent	no	no	clear	partial	yes	yes	mixed	4	zero	4.8	non-zero	39.2	5.8	28.1	590	0.469	0.213	0.2645	0.498	0.232	0.2615	0.511	0.2645	0.2725	0.557	0.301	0.3075	16.8469	43.5493	0	36.8233	0	36.3344	0	44.0361	0.410094	88.7237
tri-9	icemr5_novdec2016	tri	dry	2016-11-30	natural	no	yes	no	no	yes	yes	permanent	no	no	cloudy	partial	yes	no	sand	4	zero	5.1	zero	37.1	6.2	28.9	575	0.4055	0.271	0.292	0.498	0.2835	0.296	0.4865	0.2455	0.2705	0.508	0.2825	0.297	65.4111	27.8384	0	37.8091	0	41.9026	0	40.1122	3.26441	66.5192
lup-1	icemr6_janfebmar2017	lup	rainy	2017-01-28	natural	no	no	yes	no	yes	no	permanent	no	no	cloudy	partial	yes	yes	sand	5	zero	5.5	zero	34.6	4.3	29.1	134	0.528	0.598	0.2625	0.6055	0.641	0.3145	0.6955	0.6965	0.3405	0.7365	0.7175	0.348	6.78142	14.7139	69.3182	45.4162	34.0885	63.9814	8.12818	63.1254	3.72408	85.6231
lup-10	icemr6_janfebmar2017	lup	rainy	2017-01-30	natural	yes	yes	yes	no	yes	no	temporal	no	no	clear	partial	yes	yes	organic material	5	non-zero	5.1	zero	40.1	3.2	28.9	410	0.784	0.739	0.3725	0.7755	0.7225	0.3385	0.766	0.718	0.332	0.7615	0.7145	0.3365	0	98.2561	0	74.5173	0	62.2646	7.52319	68.7356	3.64332	38.9928
lup-11	icemr6_janfebmar2017	lup	rainy	2017-01-30	natural	no	yes	yes	no	yes	no	temporal	no	no	cloudy	total	yes	no	organic material	3	zero	4	zero	52	5.2	27.1	288	0.7975	0.7135	0.3175	0.77	0.6945	0.289	0.7955	0.711	0.306	0.7565	0.6775	0.2985	0	34.169	0	42.6043	10.8983	63.0807	5.67471	69.637	4.14489	43.9007
lup-12	icemr6_janfebmar2017	lup	rainy	2017-01-30	natural	yes	yes	yes	no	yes	no	temporal	no	no	cloudy	total	yes	no	organic material	3	zero	4.2	zero	58	6.1	27.9	455	0.685	0.665	0.3305	0.758	0.6965	0.296	0.798	0.7045	0.3045	0.7445	0.67	0.295	64.7726	69.9891	0	81.5907	0	72.6009	4.19978	67.9934	5.53367	107.812
lup-13	icemr6_janfebmar2017	lup	rainy	2017-01-30	natural	no	yes	yes	no	yes	no	temporal	no	no	cloudy	total	yes	no	mud	3	zero	5.2	non-zero	32.1	3.5	28.8	560	0.565	0.5715	0.2075	0.6025	0.63	0.2965	0.6935	0.688	0.327	0.7325	0.709	0.341	0	25.9924	0	52.7613	4.03154	56.8182	7.69185	63.8871	3.68115	28.401
lup-14	icemr6_janfebmar2017	lup	rainy	2017-01-31	natural							temporal	no	no	clear	partial	no	no	sand	3	zero	5.3	zero	15.1	2.3	29	390	0.816	0.716	0.279	0.7485	0.674	0.253	0.7825	0.7045	0.2995	0.7385	0.6655	0.2895	126.703	67.5434	0	55.0446	0	70.5227	1.97726	66.4921	5.66178	52.9272
lup-15	icemr6_janfebmar2017	lup	rainy	2017-01-31	artificial	yes	no	no	no	no	no	permanent	no	no	cloudy	partial	no	no	mud	4	zero	5.5	zero	23.9	2.5	29.1	455	0.774	0.6805	0.2345	0.742	0.6635	0.2495	0.7825	0.706	0.3005	0.7395	0.6655	0.289	131.389	36.5976	0	39.4955	0	68.1396	2.04611	66.4077	5.63967	27.3739
lup-16	icemr6_janfebmar2017	lup	rainy	2017-01-31	artificial	no	yes	yes	no	yes	no	temporal	no	no	clear	total	no	no	mud	2	non-zero	4.9	zero	29.2	3.7	28.4	390	0.759	0.683	0.297	0.7725	0.6985	0.3015	0.8	0.712	0.304	0.746	0.672	0.293	51.6158	80.3047	0	64.7139	0	72.2772	2.39268	68.0236	5.77404	58.19
lup-18	icemr6_janfebmar2017	lup	rainy	2017-01-31	natural	no	no	yes	no	yes	no	temporal	no	no	clear	total	no	no	sand	3	non-zero	5.8	zero	21.5	4.8	27.9	380	0.8145	0.7375	0.346	0.7855	0.7195	0.302	0.7845	0.7145	0.3215	0.7615	0.7025	0.317	0	52.5829	6.92974	48.5156	21.7634	63.0821	4.76806	69.6923	4.15609	63.7816
lup-19	icemr6_janfebmar2017	lup	rainy	2017-01-31	natural	no	yes	no	no	no	no	temporal	no	no	cloudy	partial	yes	no	sand	4	zero	4.4	zero	32.7	4.9	28.9	455	0.766	0.7275	0.3705	0.7655	0.7245	0.352	0.756	0.72	0.3365	0.762	0.7205	0.348	0	92.173	1.40515	80.9377	6.75502	62.7495	7.40364	69.2546	3.31438	67.9119
lup-2	icemr6_janfebmar2017	lup	rainy	2017-01-28	natural	yes	yes	yes	no	yes	no	temporal	yes	no	clear	partial	yes	yes		3	zero	5.2	zero	33.1	5.1	28.1	320	0.6115	0.6395	0.3235	0.6075	0.641	0.3075	0.6965	0.6945	0.3365	0.7405	0.7185	0.347	39.5701	23.6354	47.1306	46.1424	27.5902	62.4045	7.164	64.0166	3.67339	61.7254
lup-20	icemr6_janfebmar2017	lup	rainy	2017-01-31	natural	no	no	yes	no	yes	no	temporal	no	no	clear	total	no	no	mixed	5	zero	6.9	zero	26.1	4.5	29.2	820	0.083	0.191	0.471	0.1425	0.2965	0.434	0.238	0.4165	0.387	0.5585	0.6425	0.3725	23.1979	20.3482	0	33.1269	0	26.0766	12.5951	47.4989	1.92029	925.923
lup-23	icemr6_janfebmar2017	lup	rainy	2017-01-31	natural							temporal	no	no	clear	partial	yes	no	sand	3	non-zero	5.4	non-zero	22.1	3.5	28.1	599	0.5675	0.6315	0.2475	0.6165	0.6425	0.3145	0.696	0.6995	0.345	0.73	0.714	0.347	0	43.2844	7.87038	50.0741	27.0305	64.1592	7.96053	62.4283	3.62712	90.2988
lup-24	icemr6_janfebmar2017	lup	rainy	2017-01-31	natural	no	no	yes	no	yes	no	temporal	no	no	cloudy	total	no	no	sand	5	zero	4.8	zero	19.9	3.8	27.2	183	0.761	0.721	0.336	0.7415	0.7075	0.3425	0.7515	0.7135	0.3395	0.76	0.722	0.35	0	76.1308	10.9056	84.0788	8.92498	63.2345	7.37479	68.8418	3.00217	93.8519
lup-3	icemr6_janfebmar2017	lup	rainy	2017-01-28	natural	yes	no	yes	no	yes	no	permanent	no	no	cloudy	partial	yes	no		3	zero	5.8	zero	34.2	2.2	29	410	0.593	0.617	0.3035	0.593	0.63	0.304	0.6965	0.6915	0.332	0.7385	0.716	0.346	30.3274	25.7889	31.6017	45.4871	24.8877	60.902	7.22441	64.0393	3.6713	48.5955
lup-4	icemr6_janfebmar2017	lup	rainy	2017-01-29	natural	yes	no	yes	no	yes	no	permanent	no	no	clear	partial	yes	no	organic material	4	zero	4.9	non-zero	35.2	4.9	28.2	245	0.7135	0.675	0.301	0.725	0.676	0.29	0.7575	0.6985	0.3095	0.7555	0.7035	0.32	0	45.4397	0	38.6322	0	56.2843	5.42575	67.6289	3.82439	26.2399
lup-5	icemr6_janfebmar2017	lup	rainy	2017-01-29	natural	yes	no	yes	no	yes	no	temporal	no	no	cloudy	partial	yes	no	organic material	4	zero	4.8	non-zero	46.3	5.3	27.3	320	0.8245	0.7395	0.35	0.7985	0.7255	0.3275	0.787	0.7145	0.3195	0.76	0.701	0.315	0	49.5904	31.934	50.7245	23.5107	63.5244	5.34472	69.5625	4.16463	67.0832
lup-6	icemr6_janfebmar2017	lup	rainy	2017-01-29	natural	yes	yes	yes	no	yes	no	temporal	no	no	cloudy	partial	yes	no	mud	5	zero	5.3	zero	32.4		28.4	270	0.6345	0.653	0.301	0.587	0.5965	0.2625	0.716	0.6915	0.3205	0.752	0.7155	0.341	10.1504	85.5356	0	45.6987	5.08997	55.1153	7.92541	65.6642	3.63595	29.4152
lup-7	icemr6_janfebmar2017	lup	rainy	2017-01-29	natural	yes	no	yes	no	yes	no	permanent	no	no	clear	partial	yes	yes	sand	5	zero	4.9	zero	31.4	3.7	28.1	311	0.7585	0.707	0.3115	0.7465	0.6985	0.3035	0.7705	0.711	0.3235	0.7595	0.7085	0.327	0	79.673	0	56.7464	0	62.5768	5.1481	68.3465	4.29285	59.4811
lup-8	icemr6_janfebmar2017	lup	rainy	2017-01-29	natural	no	yes	yes	no	no	no	permanent	no	no	cloudy	partial	yes	yes	sand	5	zero	5.2	zero	37.4	4.1	27.9	390	0.7575	0.7105	0.3245	0.7425	0.687	0.2925	0.77	0.7045	0.3125	0.758	0.701	0.317	0	47.2737	0	41.5087	1.06289	59.4867	4.02102	68.1774	4.0884	41.0474
lup-9	icemr6_janfebmar2017	lup	rainy	2017-01-30	natural	no	yes	yes	no	yes	no	permanent			cloudy	partial	yes	yes	organic material	4	zero	5.6	non-zero	37.2	2.9	29.1	345	0.7875	0.722	0.355	0.748	0.6905	0.2945	0.775	0.707	0.3085	0.756	0.6985	0.312	0	51.9388	0	36.2344	19.8085	59.607	4.41036	69.0233	4.08629	29.7939
nho-1	icemr6_janfebmar2017	nho	rainy	2017-02-10	artificial	yes	yes	yes	no	yes	no	permanent	no	no	cloudy	partial	yes	yes		2	zero	4.7	non-zero	33.5	5.7	29	310	0.3705	0.448	0.3615	0.609	0.551	0.3095	0.6605	0.543	0.262	0.669	0.5545	0.2685	20.8233	37.8747	0	53.5162	0	49.4871	0	51.807	4.32224	157.549
nho-10	icemr6_janfebmar2017	nho	rainy	2017-02-11	artificial	no	no	no	yes	no	no	permanent	no	no	clear	partial	yes	yes	mud	2	zero	5.7	zero	291	4.9	28	730	0.558	0.402	0.181	0.5705	0.413	0.2035	0.584	0.442	0.218	0.6765	0.5475	0.261	18.8339	62.035	0	55.3863	0	41.2571	0.426239	54.1843	2.64268	336.319
nho-11	icemr6_janfebmar2017	nho	rainy	2017-02-12	natural	no	no	yes	no	no	no	permanent	no	no	cloudy	none	no	yes	mud	3	zero	5.2	zero	22.3	3.8	29.1	620	0.661	0.574	0.2675	0.665	0.5555	0.288	0.641	0.524	0.249	0.664	0.543	0.258	28.6406	13.8904	0	40.6327	0	44.6617	0	50.249	4.33967	195.89
nho-12	icemr6_janfebmar2017	nho	rainy	2017-02-12	natural	no	yes	yes	no	no	no	permanent	no	no	clear		yes	no	sand	2	zero	4.9	zero	31.2	3.9	29.3	510	0.902	0.749	0.382	0.871	0.7235	0.3465	0.6925	0.61	0.2695	0.6565	0.5785	0.264	0	92.1739	0	72.589	0	49.7323	0	45.8531	2.25173	294.252
nho-13	icemr6_janfebmar2017	nho	rainy	2017-02-12	natural	no	yes	yes	no	no	no	permanent	no	no	cloudy	partial	no	no	mud	3	zero	4.1	zero	24.1	3.9	28.1	380	0.501	0.41	0.2045	0.551	0.4325	0.198	0.61	0.4985	0.2245	0.644	0.5425	0.256	71.1793	31.9498	0	38.8916	0	37.7334	0.275197	48.8084	3.87586	84.3107
nho-2	icemr6_janfebmar2017	nho	rainy	2017-02-10	artificial	yes	yes	yes	no	yes	no	permanent	no	no	cloudy	partial	yes	no	sand	4	zero	4.9	non-zero	41.2	4.3	28.9	410	0.7425	0.6665	0.263	0.742	0.664	0.256	0.746	0.664	0.2825	0.8165	0.707	0.33	94.3748	0	0	3.4001	0	18.8026	0	46.2991	0.250353	1200.52
nho-3	icemr6_janfebmar2017	nho	rainy	2017-02-10	artificial	no	yes	yes	no	yes	no	permanent	no	no	cloudy	partial	yes	yes	sand	3	zero	5.1	zero	37.8	5.5	28.3	245	0.7	0.558	0.263	0.7025	0.5695	0.2495	0.662	0.5435	0.2305	0.652	0.5545	0.2565	10.6727	90.0272	0	57.4613	0	45.4375	0.903856	47.6389	0.924003	190.414
nho-4	icemr6_janfebmar2017	nho	rainy	2017-02-10	artificial	yes	yes	yes	no	yes	no	temporal	no	no	cloudy	partial	yes	no		4	zero	5.2	zero	39.2	4.1	28.1	320	0.4895	0.384	0.214	0.5635	0.423	0.209	0.6265	0.4685	0.204	0.691	0.5625	0.266	19.9764	73.627	0	50.4644	0	35.0261	1.08662	56.3844	1.96334	422.64
nho-5	icemr6_janfebmar2017	nho	rainy	2017-02-11	artificial	yes	yes	yes	no	yes	no	permanent	no	no	cloudy	total	yes	yes	mud	3	zero	4.6	zero	30.1	3.9	29.9	320	0.4575	0.3445	0.2035	0.4935	0.376	0.203	0.6095	0.4435	0.2045	0.688	0.5555	0.2635	0	19.9021	0	50.1671	0	35.6378	1.89346	57.1696	2.33831	405.538
nho-6	icemr6_janfebmar2017	nho	rainy	2017-02-11	artificial	yes	yes	yes	no	no	no	permanent	no	no	cloudy	partial	yes	no	sand	4	zero	4.2	zero	29.1	3.7	28.1	520	0.686	0.598	0.3135	0.645	0.5815	0.2735	0.719	0.6375	0.298	0.719	0.6295	0.293	2.1057	11.2806	0	27.633	0	42.4148	0.209901	49.3417	0.926062	441.403
nho-7	icemr6_janfebmar2017	nho	rainy	2017-02-11	artificial	no	yes	yes	no	yes	no	permanent	no	no	clear	total	yes	no	mixed	3	zero	5.4	zero	43.2	3.8	27.9	580	0.667	0.508	0.24	0.677	0.5185	0.237	0.675	0.5415	0.2375	0.7225	0.6055	0.2895	34.5891	5.16304	0	20.6312	0	43.7988	1.07098	52.9887	1.46178	520.37
nho-8	icemr6_janfebmar2017	nho	rainy	2017-02-12	artificial	no	yes	yes	no	yes	no	permanent	no	no	clear	partial	yes	no	mixed	3	zero	5.4	zero	43.2	3.8	27.9	580	0.5785	0.626	0.329	0.636	0.6345	0.333	0.767	0.696	0.3515	0.711	0.6635	0.344	52.8106	66.6667	0	37.5758	0	45.3351	0	46.4601	2.02529	477.24
nho-9	icemr6_janfebmar2017	nho	rainy	2017-02-12	artificial	no	yes	yes	no	yes	no	permanent	no	no	cloudy	total	yes	yes	mixed	2	zero	4.9	non-zero	45.4	5.1	28.2	320	0.4985	0.3705	0.174	0.5745	0.412	0.2035	0.607	0.443	0.241	0.6855	0.5605	0.273	32.0659	20.327	0	93.2237	0	54.6926	1.08232	57.3777	3.01023	364.061
sem-1	icemr6_janfebmar2017	sem	rainy	2017-01-10	natural	yes	yes	yes	no	yes	no	permanent	no	no	cloudy	partial	yes	yes	mixed	5	zero	4.9	zero	32.5		28.7	510	0.527	0.206	0.223	0.519333	0.205	0.225	0.501	0.196	0.206	0.5	0.2	0.203		93.2425	0	78.8946	1.40606	52.9275	9.86352	83.1854	1.78329	72.6341
sem-2	icemr6_janfebmar2017	sem	rainy	2017-01-11	natural	no	yes	no	no	yes	yes	permanent	no	no	cloudy	partial	yes	no	mixed	5	zero	4.5	zero	38.9	3.5	28.3	950	0.473667	0.182333	0.167	0.467667	0.178667	0.164333	0.47	0.166	0.159	0.505	0.194333	0.174		86.6232	0	76.5789	0	77.5338	0	82.6473	0	52.8547
tri-1	icemr6_janfebmar2017	tri	rainy	2017-03-01	artificial	no	no	yes	no	yes	yes	permanent	no	no	cloudy	partial	yes	yes	mixed	2	zero	5.4	zero	31.2	5.6	28.9		0.6555	0.5755	0.2935	0.6905	0.5765	0.2945	0.7315	0.5945	0.303	0.708	0.5765	0.2995	42.9547	27.8804	0	45.8704	0	37.5177	10.4345	45.6664	7.49725	232.351
tri-10	icemr6_janfebmar2017	tri	rainy	2017-03-02	natural	yes	no	no	no	no	no	permanent	no	no	clear	partial	yes	yes	mixed	4	zero	5.2	zero		5.8	28.9	340	0.7065	0.567	0.2795	0.686	0.559	0.262	0.777	0.62	0.302	0.7915	0.6325	0.329	23.3061	90.7256	0	76.5921	0	38.1507	0	42.01	0.27579	204.923
tri-11	icemr6_janfebmar2017	tri	rainy	2017-03-02	natural	no	no	yes	no	no	yes	temporal	no	no	clear	none	yes	no	mixed	3	zero	4.9	zero	56.3	6.2	28.7	450	0.764	0.612	0.325	0.765	0.6165	0.3145	0.805	0.6335	0.331	0.802	0.636	0.3395	13.2654	66.0879	0	67.0869	0	48.9359	0	48.7636	1.19812	338.059
tri-3	icemr6_janfebmar2017	tri	rainy	2017-03-01	artificial	yes	no	yes	no	yes	yes	permanent	no	no	cloudy	partial	yes	yes	mixed	3	zero	5.3	zero	44.8	5.1	28.9	480	0.837	0.664	0.357	0.789	0.635	0.338	0.7495	0.613	0.3175	0.8055	0.6335	0.3325	0	69.8913	0	62.8893	0	55.575	0	43.4346	0.532124	257.254
tri-4	icemr6_janfebmar2017	tri	rainy	2017-03-01	artificial	no	no	yes	no	yes	no	permanent	no	no	cloudy	partial	yes	yes	mixed	4	zero	5.1	zero	38.9	4.1	29.1	580	0.752	0.6275	0.3495	0.7595	0.635	0.3465	0.7635	0.6185	0.321	0.8075	0.6335	0.3325	10.9069	71.926	0	62.8419	0	57.4192	1.62492	41.4832	0.557047	211.119
tri-5	icemr6_janfebmar2017	tri	rainy	2017-03-01	natural	no	yes	yes	no	yes	no	permanent	no	no	cloudy	partial	yes	no	sand	4	zero	5.2	zero	42.3	4.2	29.2	755	0.4955	0.4015	0.1545	0.5985	0.4635	0.1545	0.6585	0.5325	0.237	0.776	0.617	0.3195	80.8708	0	0	5.76162	0	38.383	0	41.5828	0.555699	112.306
tri-6	icemr6_janfebmar2017	tri	rainy	2017-03-01	artificial	yes	no	yes	no	yes	no	temporal	no	no	cloudy	partial	yes	yes		4	zero	4.9	zero	45.8	4.9	28.5	810	0.69	0.5705	0.2725	0.737	0.5965	0.2835	0.8045	0.6375	0.321	0.804	0.6375	0.3305	27.6513	68.5558	0	60.5097	0	39.0935	0	39.7493	0.29148	194.919
tri-8	icemr6_janfebmar2017	tri	rainy	2017-03-02	natural	no	yes	no	no	yes	no	permanent	no	no	clear	partial	yes	yes	mixed	3	zero	4.8	non-zero	39.2	5	29.9	788	0.7475	0.581	0.3115	0.693	0.5375	0.233	0.7145	0.574	0.275	0.782	0.624	0.3245	16.8469	43.5493	0	36.8233	0	36.3344	0	44.0361	0.410094	88.7237
tri-9	icemr6_janfebmar2017	tri	rainy	2017-03-02	natural	no	yes	no	no	yes	yes	permanent	no	no	cloudy	partial	yes	no	sand	3	zero	5.3	zero	39.9	5	28.8	230	0.534	0.5105	0.3195	0.6995	0.593	0.3205	0.7485	0.606	0.3075	0.764	0.6095	0.313	65.4111	27.8384	0	37.8091	0	41.9026	0	40.1122	3.26441	66.5192
lib-1	tdr1_mar2016	lib	rainy	2016-03-19	natural	yes	yes	yes	no	no	no	permanent	yes	yes	cloudy	total	yes	yes	mixed	2	zero	5.4	zero	76	7.2	28.5	350	0.623	0.395333	0.240667	0.612667	0.39	0.23	0.611	0.403333	0.235	0.615	0.419333	0.232667	0	72.7174	0	83.3891	0	57.7557	0	74.9487	1.62636	62.956
lib-2	tdr1_mar2016	lib	rainy	2016-03-19	natural	yes	yes	yes	no	yes	no	permanent	yes	yes	clear	none	yes	yes	mixed	1	zero	5.25	non-zero	10.7	7.03	28.3	49	0.551667	0.387333	0.236	0.512	0.356333	0.245333	0.584667	0.408	0.241333	0.617	0.422667	0.236	78.848	45.6763	0	39.3455	0	54.7626	0	74.5231	1.37648	16.407
lib-3	tdr1_mar2016	lib	rainy	2016-03-19	natural	yes	yes	yes	no	yes	no	permanent	yes	yes	cloudy	partial	yes	yes	mixed	2	zero	5.4	zero	7.4	4.7	28.7	92	0.559667	0.361667	0.193	0.572	0.374333	0.207	0.596333	0.391	0.224333	0.613667	0.408667	0.230333	132.231	19.3126	0	22.6688	0	53.7699	0	72.5291	0	23.8507
lib-4	tdr1_mar2016	lib	rainy	2016-03-19	natural	yes	yes	yes	no	yes	no	permanent	yes	yes	clear	none	yes	yes	mixed	2	zero	5.2	zero	17.45	12.4	28.6	38	0.610667	0.377333	0.194333	0.598667	0.380667	0.212667	0.606667	0.396	0.22	0.616667	0.411333	0.228667	18	86.2916	0	62.7398	0	64.0828	0	74.0786	0.312984	45.6558
lib-5	tdr1_mar2016	lib	rainy	2016-03-20	natural	yes	yes	yes	no	yes	no	permanent	yes	yes	cloudy	none	yes	yes	mixed	1.5	zero	5.35	zero	15.2	6.1	26.6	142	0.588667	0.383	0.217667	0.577667	0.377333	0.225333	0.594333	0.385	0.219667	0.620667	0.407667	0.23	0	86.5867	0	65.7706	0	64.2561	0	70.5901	0.65452	55.7967
lib-7	tdr1_mar2016	lib	rainy	2016-03-20	natural	yes	yes	yes	no	yes	no	permanent	yes	yes	cloudy	none	yes	yes	mixed	3	zero	5.4	zero	14.9	6.9	26	231	0.604333	0.426	0.234333	0.563333	0.405	0.235	0.596667	0.399333	0.229	0.616	0.411667	0.233	0	77.1709	0	56.1951	0	58.5468	0	69.6358	1.31853	187.473
lib-8	tdr1_mar2016	lib	rainy	2016-03-20	natural	yes	yes	yes	yes	yes	no	permanent	yes	yes	cloudy	none	yes	yes	mixed	3	zero	5.1	zero	16.2	10.1	26.5	189	0.503	0.296	0.187	0.494667	0.298333	0.183667	0.496333	0.282	0.17	0.503333	0.294667	0.181333	0	85.6909	0	71.3968	0	62.2339	0	63.7854	0.544002	113.468
sal-1	tdr1_mar2016	sal	rainy	2016-03-13	artificial	yes	yes	yes	no	yes	yes	temporal	no	no	cloudy	partial	no	yes	mixed	1.5	zero	5.4	zero	9.9		29	266	0.713333	0.536	0.285	0.740333	0.549667	0.303333	0.717	0.546667	0.298333	0.677667	0.527667	0.299667	36.4795	-8.86119e-15	0	16.9926	0	46.9605	0	63.0344	3.99822	349.857
sal-2	tdr1_mar2016	sal	rainy	2016-03-13	natural	no	yes	no	no	no	no	temporal	no	no	cloudy	total	no	no	mud	1	zero	5.5	zero	29.4		29.6	324	0.488333	0.405333	0.259	0.534	0.426333	0.254667	0.542	0.441333	0.257667	0.503	0.364	0.240333	34.3764	36.5175	0	45.8112	0	59.8522	0	55.6184	0.113828	66.5592
sal-3	tdr1_mar2016	sal	rainy	2016-03-13	artificial	yes	yes	no	no	no	no	permanent	no	no	cloudy	partial	no	no	mud	3	zero	4.92	non-zero	7.4	4.3	31	120	0.498333	0.374	0.197	0.509667	0.403333	0.202333	0.534667	0.441333	0.279	0.527	0.403	0.258	57.742	84.9891	0	71.5734	0	70.701	0	54.0658	4.15046	188.151
sal-4	tdr1_mar2016	sal	rainy	2016-03-13	artificial	yes	yes	no	no	no	no	temporal	yes	no	cloudy	partial	no	no	mud	3	zero	5.23	non-zero	18.2	12	27.5	840	0.429	0.329667	0.162667	0.465	0.351	0.180333	0.468	0.344	0.222333	0.484333	0.359	0.279333	63.0085	34.9891	0	46.3442	1.67979	57.5557	3.95889	47.3484	4.234	296.644
sal-5	tdr1_mar2016	sal	rainy	2016-03-14	natural	yes	yes	yes	no	yes	no	permanent	no	no	cloudy	partial	no	no	mud	1.5	zero	7	zero	28.6	44.3	27.4	223	0.5	0.380333	0.223	0.494333	0.382	0.218	0.481333	0.365667	0.236333	0.426667	0.312333	0.272	0.673013	84.6446	0	84.6163	0	56.4795	2.92876	32.5064	6.04919	66.3729
sal-6	tdr1_mar2016	sal	rainy	2016-03-14	artificial	yes	yes	yes	no	yes	no	permanent	no	no	cloudy	partial	yes	no	mud	1	zero	5.35	zero	54.7	50.6	27.8	233	0.563667	0.446	0.216667	0.581	0.456333	0.182667	0.558667	0.455333	0.209667	0.521333	0.428333	0.291667	164.372	0	0	0	0	13.0547	2.81203	35.5129	0.951462	31.2507
sal-7	tdr1_mar2016	sal	rainy	2016-03-14	artificial	yes	yes	yes	no	yes	no	permanent	no	no	cloudy	none	yes	yes	mud	1.5	zero	5.18	non-zero	91	65	27.6	207	0.486	0.398333	0.206	0.590667	0.468	0.201667	0.568	0.466	0.218667	0.564	0.458333	0.291667	162.276	0	0	1.72179	0	20.9127	0	37.6543	0.613816	44.7825
sal-8	tdr1_mar2016	sal	rainy	2016-03-14	artificial	yes	no	yes	no	yes	no	temporal	no	no	cloudy	partial	yes	yes	mud	1	zero	4.8	non-zero	11.5	6.2	27.3	234	0.577333	0.479333	0.221	0.599667	0.496333	0.218333	0.601333	0.490333	0.265	0.588333	0.478	0.290333	51.4756	14.6221	0	35.4659	0	45.7707	0	43.6691	0.529767	33.3122
urc-1	tdr1_mar2016	urc	rainy	2016-03-17	natural	yes	yes	yes	no	yes	no	temporal	no	yes	cloudy	partial	yes	yes	mixed	3	non-zero	5.72	non-zero	42.9	43.2	29.2	218	0.519667	0.374333	0.265333	0.548	0.39	0.266	0.578667	0.412	0.276	0.586	0.405333	0.268	10.3119	96.9549	0	76.7191	3.836	59.0054	0.797598	47.9477	0.482753	158.239
urc-2	tdr1_mar2016	urc	rainy	2016-03-17	artificial	yes	yes	yes	no	yes	no	permanent	no	yes	cloudy	partial	yes	yes	mud	1	non-zero	4.73	zero	21.2	24.9	31.8	627	0.662667	0.468	0.251333	0.669667	0.461333	0.247333	0.645333	0.442333	0.251333	0.603	0.398	0.247333	13.0888	53.3991	0	49.0627	0	49.639	0.946863	52.2738	0.443043	59.6363
urc-3	tdr1_mar2016	urc	rainy	2016-03-17	natural	yes	yes	yes	no	no	no	temporal	no	no	cloudy	partial	yes	yes	mixed	1.5	zero	4.14	zero	84.7	59	29.8	95	0.647	0.409667	0.236	0.638333	0.399	0.226667	0.669333	0.428	0.239333	0.693333	0.460667	0.257333	0.379586	99.3446	0	96.0847	0	68.8035	2.68379	66.1123	1.72898	71.3655
urc-4	tdr1_mar2016	urc	rainy	2016-03-17	natural	yes	yes	yes	no	yes	no	permanent	yes	no	cloudy	partial	yes	yes	sand	1	zero	4.32	non-zero	21.5	12.2	29.2	205	0.636	0.39	0.219333	0.623333	0.381667	0.207	0.645	0.390667	0.222667	0.669667	0.443	0.248667	16.9288	99.673	0	88.0823	0.0562272	64.9813	1.68093	55.9801	2.13742	59.0717
urc-5	tdr1_mar2016	urc	rainy	2016-03-16	natural	yes	yes	yes	no	yes	no	permanent	no	yes	cloudy	partial	yes	yes	mixed	1.5	zero	4.96	zero	21	13.4	31.7	253	0.628	0.418333	0.221	0.641333	0.426333	0.225	0.62	0.387667	0.217	0.618333	0.381667	0.240667	74.3029	95.6736	0	70.9446	0	45.0336	0	44.1373	2.06509	30.9936
urc-6	tdr1_mar2016	urc	rainy	2016-03-16	natural	yes	yes	yes	no	yes	no	permanent	no	yes	cloudy	partial	yes	yes	mixed	1	zero	6.19	non-zero	44.2	29.8	29.2	1420	0.653	0.419333	0.234333	0.647667	0.423667	0.230667	0.603	0.371667	0.220333	0.613333	0.383333	0.242667	78.0739	72.1401	0	46.2965	0	43.3468	0	41.4693	2.0049	49.4118
urc-8	tdr1_mar2016	urc	rainy	2016-03-16	natural	yes	yes	yes	no	yes	no	temporal	no	yes	cloudy	partial	yes	yes	mixed	1	zero	5.47	zero	32.4	20.9	29.4	1225	0.615667	0.423	0.227333	0.61	0.407333	0.226	0.619	0.397667	0.238	0.613333	0.394667	0.261	199.482	56.8692	0	38.1424	0	33.2286	0	39.8666	2.46331	44.1795
urc-9	tdr1_mar2016	urc	rainy	2016-03-16	natural	yes	yes	yes	no	yes	no	permanent	no	yes	cloudy	partial	yes	no	mixed	2	zero	6.03	non-zero	22.7	14.5	29.5	98	0.701667	0.486	0.274333	0.675333	0.472333	0.265333	0.654	0.449	0.264	0.601333	0.434	0.274	4.55503	63.1264	0	48.5325	0	35.3282	2.61686	36.7833	0.86154	56.1693
vib-1	tdr1_mar2016	vib	rainy	2016-03-22	natural	yes	no	yes	yes	yes	no	temporal	yes	yes	clear	none	yes	yes	mixed	3	zero	7	zero	31.6	15.8	25.9	29	0.714333	0.579667	0.308	0.723667	0.578333	0.316667	0.725667	0.577333	0.313667	0.716667	0.564667	0.315	0	100.437	0	98.4907	0	90.167	0	88.6596	1.08383	147.508
lib-1	tdr2_jun2016	lib	rainy	2016-06-21	natural	no	yes	yes	no	no	no	permanent	yes	yes	cloudy	partial	yes	no	mixed	3	zero	6.1	zero	12.7	5.2	28	150	0.683	0.539	0.314	0.692	0.539	0.295	0.651	0.496	0.329	0.637	0.626	0.386	0	72.7174	0	83.3891	0	57.7557	0	74.9487	1.62636	62.956
lib-2	tdr2_jun2016	lib	rainy	2016-06-21	natural	yes	yes	yes	no	yes	no	permanent	yes	yes	clear	none	no	no	mixed	1	zero	6.4	zero	10	7.8	26.8	31	0.184	0.321	0.441	0.184	0.321	0.44	0.57	0.553	0.384	0.716	0.667	0.387	78.848	45.6763	0	39.3455	0	54.7626	0	74.5231	1.37648	16.407
lib-3	tdr2_jun2016	lib	rainy	2016-06-21	natural	yes	yes	yes	no	yes	no	permanent	yes	yes	clear	none	yes	no	mud	2	zero	6.9	zero	4.6	2.4	30.6	1240	0.471	0.364	0.214	0.462	0.411	0.221	0.519	0.497	0.308	0.722	0.683	0.39	132.231	19.3126	0	22.6688	0	53.7699	0	72.5291	0	23.8507
lib-4	tdr2_jun2016	lib	rainy	2016-06-21	natural	no	yes	yes	no	no	no	permanent	yes	no	clear	partial	yes	yes	organic material	2	zero	6.78	zero	6.5	4.1	29	225	0.49	0.277	0.171	0.491	0.289	0.171	0.56	0.448	0.278	0.668	0.652	0.384	18	86.2916	0	62.7398	0	64.0828	0	74.0786	0.312984	45.6558
lib-5	tdr2_jun2016	lib	rainy	2016-06-21	natural	no	yes	yes	no	no	no	permanent	no	yes	clear	partial	no	no	organic material	3	zero	6.54	zero	9.7	6.1	27.1	113	0.362	0.564	0.387	0.362	0.523	0.387	0.488	0.528	0.376	0.716	0.684	0.385	0	86.5867	0	65.7706	0	64.2561	0	70.5901	0.65452	55.7967
lib-6	tdr2_jun2016	lib	rainy	2016-06-22	natural	no	yes	yes	no	no	no	temporal	no	yes	cloudy	total	no	no	organic material	2	zero	6.9	zero	11.2	9.1	25.6	231	0.597	0.627	0.103	0.657	0.607	0.201	0.684	0.607	0.322	0.747	0.684	0.358	0	46.4619	0	51.2183	0	56.6244	0	62.2766	6.7041	32.1875
lib-7	tdr2_jun2016	lib	rainy	2016-06-22	natural	yes	yes	no	no	no	no	permanent	no	yes	cloudy	partial	no	no	mixed	3	zero	6.86	zero	9.7	4.6	26.1	18	0.602	0.628	0.244	0.531	0.562	0.389	0.691	0.723	0.397	0.731	0.715	0.392	0	77.1709	0	56.1951	0	58.5468	0	69.6358	1.31853	187.473
lib-8	tdr2_jun2016	lib	rainy	2016-06-22	natural	no	yes	no	no	no	no	permanent	yes	yes	cloudy	total	no	yes	organic material	3	zero	6.97	zero	8.8	5.9	25.2	136	0.662	0.643	0.407	0.625	0.596	0.342	0.656	0.582	0.311	0.621	0.551	0.318	0	85.6909	0	71.3968	0	62.2339	0	63.7854	0.544002	113.468
sal-2	tdr2_jun2016	sal	rainy	2016-06-14	natural	no	yes	yes	no	no	no	temporal	no	no	clear	none	yes	yes	mud		zero	6.48	zero	18.7	12.7	26.5	108	0.543	0.613	0.312	0.692	0.688	0.312	0.722	0.715	0.365	0.676	0.692	0.42	34.3764	36.5175	0	45.8112	0	59.8522	0	55.6184	0.113828	66.5592
sal-3	tdr2_jun2016	sal	rainy	2016-06-14	artificial	no	no	yes	no	yes	no	permanent	no	no	clear	none	yes	no	mud	0.7	zero	6.37	zero	7	4.7	26.7	65	0.641	0.648	0.226	0.662	0.658	0.25	0.716	0.723	0.357	0.708	0.707	0.41	57.742	84.9891	0	71.5734	0	70.701	0	54.0658	4.15046	188.151
sal-4	tdr2_jun2016	sal	rainy	2016-06-14	artificial	no	no	no	no	no	no	temporal	no	no	cloudy	total	no	no	mud	1	zero	6.52	zero	13.3	7.2	31.7	641	0.558	0.602	0.232	0.649	0.642	0.232	0.659	0.66	0.361	0.66	0.668	0.418	63.0085	34.9891	0	46.3442	1.67979	57.5557	3.95889	47.3484	4.234	296.644
sal-5	tdr2_jun2016	sal	rainy	2016-06-15	natural	yes	yes	yes	no	yes	no	permanent	no	no	cloudy	total	yes	no	mud	2	zero	6.42	zero	26.6	17.4	27.6	24	0.756	0.763	0.41	0.744	0.755	0.388	0.692	0.707	0.396	0.581	0.604	0.425	0.673013	84.6446	0	84.6163	0	56.4795	2.92876	32.5064	6.04919	66.3729
sal-6	tdr2_jun2016	sal	rainy	2016-06-15	artificial	yes	yes	yes	yes	yes	no	permanent	no	no	cloudy	total	yes	no	mud	2	zero	6.4	zero	26.4	15.9	28.3	20	0.64	0.622	0.231	0.661	0.63	0.227	0.638	0.63	0.268	0.622	0.637	0.432	164.372	0	0	0	0	13.0547	2.81203	35.5129	0.951462	31.2507
sal-7	tdr2_jun2016	sal	rainy	2016-06-15	artificial	yes	no	no	no	no	yes	permanent	no	no	cloudy	partial	yes	no	mud	0.5	zero	7	zero	8.8	5	30	520	0.481	0.486	0.27	0.682	0.656	0.251	0.622	0.637	0.283	0.644	0.653	0.439	162.276	0	0	1.72179	0	20.9127	0	37.6543	0.613816	44.7825
sal-8	tdr2_jun2016	sal	rainy	2016-06-15	artificial	yes	yes	no	no	no	yes	temporal	no	no	cloudy	partial	yes	no	mud	1	zero	7	zero	20.9	9.8	29.7	185	0.611	0.641	0.276	0.682	0.676	0.276	0.677	0.677	0.382	0.677	0.677	0.448	51.4756	14.6221	0	35.4659	0	45.7707	0	43.6691	0.529767	33.3122
sal-9	tdr2_jun2016	sal	rainy	2016-06-15	artificial	no	no	yes	yes	yes	no	temporal	no	no	cloudy	partial	yes	no	mud	1	zero	6.5	zero	42.5	34.2	28.3	406	0.697	0.657	0.312	0.649	0.632	0.306	0.564	0.589	0.339	0.551	0.589	0.47	106.124	0	0	7.64844	0	13.4974	0	36.4976	0.633715	28.3187
urc-1	tdr2_jun2016	urc	rainy	2016-06-26	natural	yes	yes	yes	no	yes	no	temporal	no	no	cloudy	partial	yes	yes	mixed	5	zero	5.9	zero	12.7	8.5	27.5	1020	0.715	0.626	0.377	0.771	0.679	0.382	0.793	0.701	0.399	0.606	0.575	0.393	10.3119	96.9549	0	76.7191	3.836	59.0054	0.797598	47.9477	0.482753	158.239
urc-2	tdr2_jun2016	urc	rainy	2016-06-26	artificial	yes	yes	yes	yes	yes	no	permanent	no	yes	cloudy	partial	yes	yes	mixed	1	non-zero	5.28	non-zero	12.1	7.8	29	820	0.709	0.749	0.459	0.735	0.741	0.393	0.757	0.724	0.393	0.652	0.589	0.377	13.0888	53.3991	0	49.0627	0	49.639	0.946863	52.2738	0.443043	59.6363
urc-4	tdr2_jun2016	urc	rainy	2016-06-26	natural	yes	yes	yes	no	yes	no	permanent	no	no	cloudy	partial	yes	no	mixed	1	zero	7.1	non-zero	21.2	15.7	27.1	550	0.861	0.729	0.412	0.876	0.729	0.376	0.756	0.632	0.342	0.66	0.59	0.342	16.9288	99.673	0	88.0823	0.0562272	64.9813	1.68093	55.9801	2.13742	59.0717
urc-5	tdr2_jun2016	urc	rainy	2016-06-26	natural	yes	yes	yes	no	no	no	permanent	no	no	cloudy	partial	yes	yes	mixed	3	non-zero		non-zero	19.2	11.3	27.1	320	0.735	0.712	0.316	0.772	0.72	0.339	0.762	0.653	0.342	0.67	0.598	0.373	74.3029	95.6736	0	70.9446	0	45.0336	0	44.1373	2.06509	30.9936
urc-6	tdr2_jun2016	urc	rainy	2016-06-26	natural	yes	yes	yes	no	yes	no	permanent	no	no	cloudy	partial	yes	yes	mixed	3	non-zero	6.3	non-zero	18.4	11.3	28.9	465	0.833	0.738	0.355	0.833	0.733	0.364	0.737	0.651	0.361	0.707	0.606	0.385	78.0739	72.1401	0	46.2965	0	43.3468	0	41.4693	2.0049	49.4118
urc-7	tdr2_jun2016	urc	rainy	2016-06-26	artificial	yes	yes	yes	no	no	no	temporal	no	no	cloudy	partial	yes	yes	mixed	3	zero	6.1	zero	19.6	12.5	28.5	598	0.813	0.677	0.316	0.835	0.707	0.329	0.832	0.707	0.355	0.736	0.622	0.373	21.3785	71.9826	0	83.5418	0	55.8774	5.46743	44.0139	1.81602	122.479
urc-8	tdr2_jun2016	urc	rainy	2016-06-27	natural	yes	yes	no	no	yes	no	temporal	no	no	cloudy	partial	yes	yes	mixed	3	zero	5.6	zero	47.2	35.2	27.1	1525	0.883	0.747	0.352	0.861	0.747	0.365	0.795	0.699	0.396	0.762	0.644	0.412	199.482	56.8692	0	38.1424	0	33.2286	0	39.8666	2.46331	44.1795
urc-9	tdr2_jun2016	urc	rainy	2016-06-27	natural	yes	yes	yes	no	yes	no	permanent	no	no	cloudy	partial	yes	yes	mixed	3	zero	5.9	zero	50.1	36.1	28.9	1824	0.845	0.782	0.418	0.845	0.777	0.402	0.83	0.732	0.424	0.831	0.731	0.439	4.55503	63.1264	0	48.5325	0	35.3282	2.61686	36.7833	0.86154	56.1693
vib-1	tdr2_jun2016	vib	rainy	2016-06-23	natural	no	yes	yes	no	no	no	temporal	no	no	cloudy	total	yes	no	organic material	3	zero	6.9	zero	6.4	4.5	25.1	128	0.801	0.753	0.366	0.734	0.73	0.373	0.638	0.627	0.363	0.696	0.705	0.394	0	100.437	0	98.4907	0	90.167	0	88.6596	1.08383	147.508
lib-1	tdr3_sep2016	lib	dry	2016-09-12	natural	yes	yes	yes	no	no	no	permanent	yes	no	cloudy	total	yes	no	mud	1.5	zero		zero	24.9	22.9	27	666	0.678333	0.552333	0.295667	0.662333	0.555	0.291	0.587333	0.486667	0.286667	0.607667	0.525333	0.305667	0	72.7174	0	83.3891	0	57.7557	0	74.9487	1.62636	62.956
lib-2	tdr3_sep2016	lib	dry	2016-09-12	natural	no	no	yes	no	no	no	permanent	yes	no	cloudy	partial	yes	no	mud	2	zero	7.09	non-zero	42.5	14.9	29.5	666	0.428667	0.363667	0.292	0.356	0.331333	0.306	0.599333	0.513333	0.305	0.628333	0.57	0.317	78.848	45.6763	0	39.3455	0	54.7626	0	74.5231	1.37648	16.407
lib-3	tdr3_sep2016	lib	dry	2016-09-12	natural	yes	yes	yes	no	no	no	permanent	yes	no	cloudy	partial	yes	no	mud	2	zero	7.1	zero	30.8	15.6	28.3	410	0.432	0.398	0.117333	0.486667	0.431	0.224333	0.554333	0.508	0.295	0.609	0.553	0.312333	132.231	19.3126	0	22.6688	0	53.7699	0	72.5291	0	23.8507
lib-4	tdr3_sep2016	lib	dry	2016-09-12	natural							permanent					yes	no	mud	2	zero	7.09	non-zero	31.2	16.3	28.2	540	0.640667	0.518667	0.224333	0.660333	0.548333	0.289333	0.606667	0.543333	0.305333	0.606	0.536	0.307	18	86.2916	0	62.7398	0	64.0828	0	74.0786	0.312984	45.6558
lib-5	tdr3_sep2016	lib	dry	2016-09-12	natural	yes	yes	yes	no	no	no	permanent	yes	no	clear	partial	yes	no	mud	1.5	zero	7.11	zero	21	9.3	31	163	0.527333	0.474667	0.258	0.519667	0.466333	0.285667	0.574667	0.529333	0.309667	0.599667	0.546333	0.308667	0	86.5867	0	65.7706	0	64.2561	0	70.5901	0.65452	55.7967
lib-7	tdr3_sep2016	lib	dry	2016-09-12	natural	yes	yes	yes	no	no	no	permanent	yes	no	cloudy	total	yes	no	mud	1.2	zero	7.01	non-zero	8.6	4.5	29.1	220	0.542	0.474667	0.262667	0.511	0.439667	0.301	0.562667	0.498	0.281333	0.586667	0.521333	0.295333	0	77.1709	0	56.1951	0	58.5468	0	69.6358	1.31853	187.473
lib-8	tdr3_sep2016	lib	dry	2016-09-12	natural	yes	yes	yes	no	no	no	permanent	yes	no	cloudy	total	yes	yes	mud	3	non-zero	7.35	non-zero	22.9	3.9	27	666	0.58	0.560333	0.334	0.624	0.564	0.329667	0.637667	0.569333	0.312667	0.662667	0.585333	0.318667	0	85.6909	0	71.3968	0	62.2339	0	63.7854	0.544002	113.468
sal-1	tdr3_sep2016	sal	dry	2016-09-07	artificial	yes	yes	yes	no	yes	no	temporal	no	no	clear	partial	yes	yes	mud	2	zero	4.2		20.5	12.4	28.9	705	0.591667	0.474	0.246333	0.640667	0.487333	0.258	0.620667	0.49	0.263333	0.618	0.487	0.267333	36.4795	-8.86119e-15	0	16.9926	0	46.9605	0	63.0344	3.99822	349.857
sal-3	tdr3_sep2016	sal	dry	2016-09-07	artificial	yes	yes	yes	no	yes	no	permanent	no	no	clear		no	no		1	non-zero	3.1		22	12.4	29.2	680	0.558667	0.345	0.159667	0.542	0.363	0.161	0.546	0.398667	0.193	0.542333	0.409333	0.235333	57.742	84.9891	0	71.5734	0	70.701	0	54.0658	4.15046	188.151
sal-5	tdr3_sep2016	sal	dry	2016-09-07	natural	yes	no	no	yes	no	no	permanent	no	no	clear	none	no	yes	mud	0.5	non-zero	3.2	non-zero	21.6	11.4	29.4	902	0.516	0.374	0.223	0.514667	0.378333	0.222	0.491667	0.359333	0.223	0.438667	0.320333	0.251	0.673013	84.6446	0	84.6163	0	56.4795	2.92876	32.5064	6.04919	66.3729
sal-6	tdr3_sep2016	sal	dry	2016-09-07	artificial	yes	no	yes	no	no	no	permanent	no	yes	clear	none	no	no	mud	1.5	zero	6.52	non-zero	10.8	32.6	28	666	0.516	0.434	0.217333	0.541	0.474	0.190333	0.527333	0.457667	0.220667	0.496	0.413333	0.291333	164.372	0	0	0	0	13.0547	2.81203	35.5129	0.951462	31.2507
sal-7	tdr3_sep2016	sal	dry	2016-09-08	artificial	no	no	yes	yes	yes	no	permanent	no	no	clear	none	yes	no	mud	0.5	zero	7.11	zero	14.9	36	28.2	855	0.534667	0.497667	0.212333	0.54	0.502	0.216	0.515667	0.453333	0.228333	0.523	0.441333	0.299	162.276	0	0	1.72179	0	20.9127	0	37.6543	0.613816	44.7825
urc-2	tdr3_sep2016	urc	dry	2016-09-09	artificial	yes	yes	yes	yes	no	no	permanent	no	no	clear	none	yes	yes	mud	1	zero	6.9	zero	13.2	24.2	30.8	120	0.694	0.564667	0.297667	0.673667	0.551667	0.265	0.597	0.488333	0.235	0.548667	0.398667	0.280667	13.0888	53.3991	0	49.0627	0	49.639	0.946863	52.2738	0.443043	59.6363
urc-3	tdr3_sep2016	urc	dry	2016-09-09	natural	yes	yes	yes	no	no	no	temporal	no	no	clear	none	yes	no	mud	1	zero	6.4	zero	5.4	14.2	28.9	22	0.618667	0.426667	0.269667	0.602333	0.420667	0.255667	0.637	0.466667	0.263333	0.633333	0.496333	0.260667	0.379586	99.3446	0	96.0847	0	68.8035	2.68379	66.1123	1.72898	71.3655
urc-4	tdr3_sep2016	urc	dry	2016-09-09	natural	yes	yes	yes	no	no	no	permanent	yes	no	clear	none	no	yes	mud	0.5	non-zero	7.1	zero	17.8	12.9	27.4	430	0.667	0.575	0.329667	0.66	0.580667	0.325667	0.651667	0.548333	0.282	0.637333	0.509	0.279667	16.9288	99.673	0	88.0823	0.0562272	64.9813	1.68093	55.9801	2.13742	59.0717
urc-5	tdr3_sep2016	urc	dry	2016-09-10	natural	yes	yes	yes	no	no	no	permanent	yes	no	clear	partial	yes	yes	mud	0.2	zero	6.7	non-zero	17.9	18.9	29.8	2720	0.612	0.503	0.235667	0.648	0.541667	0.265667	0.615667	0.509667	0.295667	0.575667	0.461	0.296	74.3029	95.6736	0	70.9446	0	45.0336	0	44.1373	2.06509	30.9936
urc-6	tdr3_sep2016	urc	dry	2016-09-10	natural	no	yes	yes	no	no	yes	permanent	yes	no	clear	partial	yes	yes	mud	0.3	zero	6.7	non-zero	13.9	37.2	29.7	705	0.673	0.534667	0.27	0.644667	0.518	0.271333	0.6	0.499333	0.291	0.583	0.484	0.314333	78.0739	72.1401	0	46.2965	0	43.3468	0	41.4693	2.0049	49.4118
urc-7	tdr3_sep2016	urc	dry	2016-09-10	artificial	yes	yes	yes	no	no	yes	temporal	no	no	clear	partial	yes	yes	mud	0.5	zero	6.1	non-zero	36.2	87.4	29.4	965	0.600667	0.539	0.303333	0.636333	0.543667	0.288	0.656667	0.547667	0.286	0.635	0.525333	0.313	21.3785	71.9826	0	83.5418	0	55.8774	5.46743	44.0139	1.81602	122.479
urc-8	tdr3_sep2016	urc	dry	2016-09-10	natural	yes	yes	yes	no	no	no	temporal	yes	no	cloudy	partial	yes	no	mud	0.2	zero	6.87	non-zero	11.7	17.3	26.5	930	0.614667	0.473667	0.240333	0.629	0.486667	0.249333	0.590667	0.485333	0.283333	0.581333	0.512	0.326	199.482	56.8692	0	38.1424	0	33.2286	0	39.8666	2.46331	44.1795
urc-9	tdr3_sep2016	urc	dry	2016-09-10	natural	yes	yes	yes	no	no	no	permanent	yes	no	clear	partial	yes	no	mud	0.2	non-zero	6.9	non-zero	0	1.4	25.2	679	0.594	0.578	0.342333	0.569667	0.519333	0.312	0.587667	0.506	0.318	0.598667	0.531333	0.339	4.55503	63.1264	0	48.5325	0	35.3282	2.61686	36.7833	0.86154	56.1693
vib-2	tdr3_sep2016	vib	dry	2016-09-15	natural	yes	yes	yes	no	no	no	temporal	yes	no	cloudy	partial	yes	no	mud	1	zero	7.02	zero	81	22.6	28	630													0
vib-3	tdr3_sep2016	vib	dry	2016-09-15	natural	yes	yes	yes	no	no	no	temporal	yes	no	clear	none	yes	no	mud	1	non-zero	7.08	zero	32.2	32	29.3	251													0
vib-5	tdr3_sep2016	vib	dry	2016-09-15	natural	yes	yes	yes	no	no	no	temporal	yes	no	clear	partial	yes	no	mud	1	non-zero	7.03	non-zero	34.6	24.9	29	283													0
lib-1	tdr4_nov2016	lib	dry	2016-11-26	natural	no	no	no	no	no	no	permanent	yes	no			yes	no	mud	0.5	non-zero	5.87		20.7	12	27.9	128	0.51275	0.302	0.2285	0.51775	0.31375	0.235	0.52275	0.327	0.255	0.51475	0.36025	0.2775	0	72.7174	0	83.3891	0	57.7557	0	74.9487	1.62636	62.956
lib-2	tdr4_nov2016	lib	dry	2016-11-26	natural	no	no	no	no	no	no	permanent	yes	no					mud	2	zero	6.7	non-zero	21.7	11.1	26.5	53	0.49225	0.3415	0.248	0.45125	0.3225	0.256	0.4865	0.34775	0.27575	0.51125	0.347	0.271	78.848	45.6763	0	39.3455	0	54.7626	0	74.5231	1.37648	16.407
lib-3	tdr4_nov2016	lib	dry	2016-11-26	natural	no	no	no	no	no	no	permanent	yes	no			yes	no	mud	2	non-zero	6.7	non-zero	20	9.2	29		0.4575	0.23725	0.19125	0.46525	0.2415	0.206	0.4775	0.2645	0.2315	0.512	0.313	0.253	132.231	19.3126	0	22.6688	0	53.7699	0	72.5291	0	23.8507
lib-4	tdr4_nov2016	lib	dry	2016-11-26	natural	no	no	no	no	no	no	permanent	yes	no			yes	no	mud	2	zero	5.95	non-zero	18.2	8.1	28.8	74	0.4715	0.263	0.22725	0.48725	0.26375	0.2295	0.48425	0.268	0.23325	0.51075	0.2985	0.24875	18	86.2916	0	62.7398	0	64.0828	0	74.0786	0.312984	45.6558
lib-5	tdr4_nov2016	lib	dry	2016-11-27	natural	no	no	no	no	no	no	permanent	yes	no	cloudy		yes	no	mud	1.5	non-zero	6.52	zero	25.8	11.5	32.1	345	0.4705	0.2685	0.22175	0.4715	0.2565	0.22275	0.49475	0.2855	0.2395	0.51025	0.30225	0.25075	0	86.5867	0	65.7706	0	64.2561	0	70.5901	0.65452	55.7967
lib-7	tdr4_nov2016	lib	dry	2016-11-27	natural	no	no	no	no	no	no	permanent	yes	no	cloudy				mud	1	zero	6.24	non-zero	25.7	11.5	30.2	1002	0.5475	0.33425	0.2395	0.534	0.32725	0.2385	0.5405	0.32525	0.24575	0.544	0.32025	0.2555	0	77.1709	0	56.1951	0	58.5468	0	69.6358	1.31853	187.473
lib-8	tdr4_nov2016	lib	dry	2016-11-27	natural	no	no	no	no	no	no	permanent	yes	no		partial	yes	no	mud	2	zero	5.5	non-zero	31.7	13.6	30.7	1056	0.5585	0.39325	0.279	0.5685	0.38675	0.271	0.58575	0.39175	0.26575	0.5605	0.38075	0.27375	0	85.6909	0	71.3968	0	62.2339	0	63.7854	0.544002	113.468
sal-1	tdr4_nov2016	sal	dry	2016-11-20	artificial	yes	no	yes	yes	no	no	temporal	no	no	clear	partial	yes	no	mud	1.5	non-zero	7	zero	15.7	3.9	28.8	863	0.592	0.401667	0.227667	0.609	0.42	0.235667	0.620333	0.442	0.237667	0.608667	0.45	0.264	36.4795	-8.86119e-15	0	16.9926	0	46.9605	0	63.0344	3.99822	349.857
sal-3	tdr4_nov2016	sal	dry	2016-11-20	artificial	no	no	yes	yes	no	no	permanent	no	no	cloudy	partial	yes	no	mud	1	zero	5.5	non-zero		1.2	32.5	993	0.421333	0.366667	0.230333	0.432667	0.374	0.233	0.463	0.405667	0.281333	0.469	0.402667	0.310333	57.742	84.9891	0	71.5734	0	70.701	0	54.0658	4.15046	188.151
sal-4	tdr4_nov2016	sal	dry	2016-11-20	artificial	no	no	yes	yes	no	no	temporal	no	no	cloudy	partial	yes	no	mud	0.3	zero	6	zero			31.6	1391	0.411333	0.359667	0.250333	0.435333	0.383333	0.26	0.436	0.374	0.318333	0.4035	0.29025	0.319	63.0085	34.9891	0	46.3442	1.67979	57.5557	3.95889	47.3484	4.234	296.644
sal-5	tdr4_nov2016	sal	dry	2016-11-20	natural	yes	yes	no	no	no	no	permanent	no	no	cloudy	partial	no	yes	organic material	0.5	non-zero	6	zero			29.5	96	0.447333	0.386667	0.309	0.48	0.400667	0.323333	0.4265	0.30325	0.30525	0.38375	0.23525	0.31725	0.673013	84.6446	0	84.6163	0	56.4795	2.92876	32.5064	6.04919	66.3729
sal-6	tdr4_nov2016	sal	dry	2016-11-21	artificial	yes	yes	yes	no	no	no	permanent	no	no	clear	none	yes	no	mud	1	zero	5.5	zero	32.7	17.6	28.8	645	0.514	0.308333	0.288333	0.44025	0.242	0.26675	0.42725	0.23475	0.25625	0.41475	0.23325	0.29325	164.372	0	0	0	0	13.0547	2.81203	35.5129	0.951462	31.2507
sal-7	tdr4_nov2016	sal	dry	2016-11-21	artificial	yes	yes	yes	no	no	no	permanent	no	no	clear	none	yes	no	mud	1	zero	6		13.5	5.2	29.6	673	0.448	0.271	0.219333	0.4355	0.23425	0.24175	0.4235	0.227	0.25475	0.42375	0.23475	0.283	162.276	0	0	1.72179	0	20.9127	0	37.6543	0.613816	44.7825
sal-8	tdr4_nov2016	sal	dry	2016-11-21	artificial	yes	no	no	no	no	no	temporal	no	no	clear	none	no	no	mud	0.5	zero	5.5	zero	18	7.8	29.5	759	0.449667	0.281	0.227333	0.41175	0.22425	0.238	0.437	0.229	0.2675	0.43625	0.24325	0.28	51.4756	14.6221	0	35.4659	0	45.7707	0	43.6691	0.529767	33.3122
sal-9	tdr4_nov2016	sal	dry	2016-11-21	artificial	no	no	no	yes	no	no	temporal	no	no	clear	none	yes	no	mud	0.3	zero	5.5	zero	34.2	13.9	29.6	755	0.438	0.23475	0.2395	0.423	0.228	0.25075	0.4045	0.218	0.2575	0.3955	0.219	0.28525	106.124	0	0	7.64844	0	13.4974	0	36.4976	0.633715	28.3187
urc-2	tdr4_nov2016	urc	dry	2016-11-23	artificial	yes	yes	yes	yes	no	no	permanent	no	no	cloudy	total	no	no	mud	1	non-zero	6.7	zero	14.6	15.1	29	250	0.835	0.678667	0.357	0.865667	0.670333	0.323667	0.803	0.639667	0.318	0.773	0.629333	0.367	13.0888	53.3991	0	49.0627	0	49.639	0.946863	52.2738	0.443043	59.6363
urc-3	tdr4_nov2016	urc	dry	2016-11-23	natural	yes	yes	yes	no	no	no	temporal	no	no	cloudy	total	yes	no	mud	1	non-zero	5.5	zero	9.9	13.1	29.2	37	0.887333	0.716667	0.389667	0.901	0.717667	0.386333	0.879333	0.708333	0.377667	0.885	0.704667	0.374333	0.379586	99.3446	0	96.0847	0	68.8035	2.68379	66.1123	1.72898	71.3655
urc-4	tdr4_nov2016	urc	dry	2016-11-23	natural	yes	yes	yes	yes	no	no	permanent	yes	no	cloudy	total	no	no	sand	0.8	non-zero	6.5	non-zero	18.9	22.2	28.4	220	0.876667	0.7	0.387	0.861667	0.696	0.373333	0.85	0.697	0.368667	0.86	0.695	0.377	16.9288	99.673	0	88.0823	0.0562272	64.9813	1.68093	55.9801	2.13742	59.0717
urc-5	tdr4_nov2016	urc	dry	2016-11-23	natural	yes	yes	yes	no	no	no	permanent	yes	no	cloudy	partial	no	no	mud	0.3	zero	5.9	non-zero	8.2	5.9	30.4	80	0.656667	0.634	0.339	0.673333	0.647	0.362	0.670667	0.617667	0.365333	0.704667	0.622667	0.375333	74.3029	95.6736	0	70.9446	0	45.0336	0	44.1373	2.06509	30.9936
urc-6	tdr4_nov2016	urc	dry	2016-11-23	natural	yes	yes	yes	no	no	no	permanent	yes	no	cloudy	partial	yes	no	mud	0.2	zero	6.32	zero	5.2	5.3	29.4	429	0.630333	0.623667	0.327	0.650667	0.628667	0.346333	0.637	0.616667	0.377667	0.678667	0.617667	0.383333	78.0739	72.1401	0	46.2965	0	43.3468	0	41.4693	2.0049	49.4118
urc-7	tdr4_nov2016	urc	dry	2016-11-23	artificial	yes	yes	yes	no	yes	no	temporal	no	no	clear	partial	no	no	mud	0.3	non-zero	5.7	zero	20.1	4.3	31.2	201	0.705	0.674667	0.394333	0.711667	0.675333	0.386667	0.736	0.681	0.365333	0.790333	0.674667	0.395333	21.3785	71.9826	0	83.5418	0	55.8774	5.46743	44.0139	1.81602	122.479
vib-1	tdr4_nov2016	vib	dry	2016-11-29	natural	yes	yes	yes	yes	no	no	temporal	yes	no	cloudy	partial	yes	no	organic material	1.5	non-zero	6.77	zero	34.6	14.8	26.7	227	0.43125	0.343	0.385	0.42925	0.3435	0.3885	0.44225	0.34925	0.3895	0.48925	0.3485	0.36575	0	100.437	0	98.4907	0	90.167	0	88.6596	1.08383	147.508
lib-1	tdr5_febmar2017	lib	rainy	2017-03-01	natural	yes	yes	no	no	no	no	permanent	yes	no	clear	total	yes	no	mud	1	zero	5.73	zero	44.6	21	30.3	95	0.71275	0.58275	0.29625	0.713	0.58425	0.295	0.691	0.587	0.321	0.6915	0.61725	0.348	0	72.7174	0	83.3891	0	57.7557	0	74.9487	1.62636	62.956
lib-2	tdr5_febmar2017	lib	rainy	2017-03-01	natural	yes	yes	yes	no	no	no	permanent	yes	no	clear	none	yes	no	mud	2	zero	5.6	zero	10	6.4	29.3	684	0.48625	0.447	0.29775	0.426	0.4075	0.298	0.68375	0.56575	0.32025	0.7015	0.63475	0.35475	78.848	45.6763	0	39.3455	0	54.7626	0	74.5231	1.37648	16.407
lib-3	tdr5_febmar2017	lib	rainy	2017-03-01	natural	yes	yes	no	no	yes	no	permanent	yes	no	clear	none	yes	no	mud	2	zero	5.57	non-zero	22.2	8.4	28.3	684	0.52475	0.503	0.26575	0.57425	0.52575	0.2975	0.64475	0.594	0.3395	0.711	0.64375	0.35975	132.231	19.3126	0	22.6688	0	53.7699	0	72.5291	0	23.8507
lib-4	tdr5_febmar2017	lib	rainy	2017-03-01	natural	yes	yes	yes	no	yes	no	permanent	yes	no	clear	none	yes	yes	mud	2	zero	5.12	zero	11.5	7	28.2	416	0.66825	0.603	0.325	0.64175	0.61625	0.36225	0.63675	0.60925	0.354	0.714	0.64475	0.36225	18	86.2916	0	62.7398	0	64.0828	0	74.0786	0.312984	45.6558
lib-5	tdr5_febmar2017	lib	rainy	2017-03-01	natural	yes	yes	yes	no	yes	no	permanent	yes	no	clear	none	yes	no	mud	1.5	zero	5.1	non-zero	5	2.2	31.9	360	0.58025	0.589	0.31725	0.611	0.6015	0.34075	0.661	0.6165	0.35325	0.7145	0.6435	0.3565	0	86.5867	0	65.7706	0	64.2561	0	70.5901	0.65452	55.7967
lib-6	tdr5_febmar2017	lib	rainy	2017-03-02	natural	yes	yes	yes	no	yes	no	temporal	yes	no	clear	none	yes	no	mud	2	zero	5.3	zero	17	7	28.6	976	0.65925	0.616	0.26725	0.669	0.615	0.3025	0.678	0.6485	0.36	0.71875	0.65975	0.3645	0	46.4619	0	51.2183	0	56.6244	0	62.2766	6.7041	32.1875
lib-7	tdr5_febmar2017	lib	rainy	2017-03-01	natural	yes	yes	yes	no	yes	no	permanent	yes	no	clear	none	yes	no	mud	1.5	zero	5	non-zero	16	8.2	30.1	275	0.55475	0.555	0.332	0.50275	0.52425	0.32525	0.61025	0.59225	0.3505	0.71075	0.6365	0.35925	0	77.1709	0	56.1951	0	58.5468	0	69.6358	1.31853	187.473
lib-8	tdr5_febmar2017	lib	rainy	2017-03-02	natural	yes	yes	yes	no	yes	no	permanent	yes	no	clear	none	yes	no	mud	1.5	zero	5.7	zero	38.6	18	32.3	130	0.645	0.56925	0.3245	0.65	0.54275	0.3035	0.66925	0.5725	0.315	0.7075	0.63525	0.34525	0	85.6909	0	71.3968	0	62.2339	0	63.7854	0.544002	113.468
sal-1	tdr5_febmar2017	sal	rainy	2017-02-23	artificial	no	yes	yes	no	no	no	temporal	no	no	cloudy	total	yes	yes	mud	1	zero	5.54	zero	18.5	9.8	27.6	214	0.493667	0.49	0.312333	0.544667	0.503667	0.328	0.531667	0.491	0.316	0.526333	0.493	0.319	36.4795	-8.86119e-15	0	16.9926	0	46.9605	0	63.0344	3.99822	349.857
sal-3	tdr5_febmar2017	sal	rainy	2017-02-23	artificial	yes	yes	yes	no	no	no	permanent	no	no	cloudy	partial	yes	yes	mud	0.5	zero	5.36	non-zero	7.6	3.3	29.6	153	0.472	0.444667	0.225667	0.489	0.451667	0.237333	0.505	0.471333	0.269333	0.481333	0.477667	0.303	57.742	84.9891	0	71.5734	0	70.701	0	54.0658	4.15046	188.151
sal-4	tdr5_febmar2017	sal	rainy	2017-02-23	artificial	yes	yes	yes	no	no	no	temporal	no	no	cloudy	total	yes	yes	mud	0.8	zero	5.65	zero	7.5	3.1	30.5	353	0.566333	0.573	0.252667	0.551333	0.565667	0.267333	0.473333	0.470667	0.305333	0.3965	0.35875	0.28975	63.0085	34.9891	0	46.3442	1.67979	57.5557	3.95889	47.3484	4.234	296.644
sal-5	tdr5_febmar2017	sal	rainy	2017-02-23	natural	yes	yes	yes	no	no	no	permanent	yes	no	cloudy	partial	yes	yes	mud	0.6	zero	5.5	zero	8.6	5.8	27.1	64	0.413	0.522667	0.388333	0.476	0.580667	0.394333	0.42775	0.42325	0.33375	0.362	0.3295	0.31575	0.673013	84.6446	0	84.6163	0	56.4795	2.92876	32.5064	6.04919	66.3729
sal-6	tdr5_febmar2017	sal	rainy	2017-02-24	artificial	yes	yes	yes	no	no	no	permanent	no	no	cloudy	partial	yes	yes	mud	1	zero	5.42	non-zero	26.9	12.3	28.8	353	0.44225	0.356	0.22125	0.427	0.3615	0.2105	0.3985	0.35725	0.2425	0.37425	0.3345	0.318	164.372	0	0	0	0	13.0547	2.81203	35.5129	0.951462	31.2507
sal-7	tdr5_febmar2017	sal	rainy	2017-02-24	artificial	yes	no	no	yes	no	no	permanent	no	no	cloudy	partial	yes	yes	mud	0.5	zero	6.41	zero	26	26.8	30.2	210	0.39675	0.414	0.25875	0.43975	0.44	0.25325	0.4015	0.36	0.2495	0.379	0.3305	0.30175	162.276	0	0	1.72179	0	20.9127	0	37.6543	0.613816	44.7825
sal-8	tdr5_febmar2017	sal	rainy	2017-02-24	artificial	yes	yes	no	yes	no	no	temporal	no	no	cloudy	partial	yes	yes	mud	1	zero	6.19	zero	9.3	3.9	30.1	142	0.455333	0.449667	0.278333	0.43975	0.39	0.2505	0.4215	0.3735	0.2625	0.38725	0.33275	0.2915	51.4756	14.6221	0	35.4659	0	45.7707	0	43.6691	0.529767	33.3122
sal-9	tdr5_febmar2017	sal	rainy	2017-02-24	artificial	yes	yes	yes	no	no	no	temporal	no	no	cloudy	partial	yes	yes	mud	1	non-zero	5.39	zero	6.7	3.8	29.3	51	0.473	0.469	0.287	0.428	0.4345	0.278	0.3745	0.33375	0.28075	0.34625	0.29525	0.31525	106.124	0	0	7.64844	0	13.4974	0	36.4976	0.633715	28.3187
urc-1	tdr5_febmar2017	urc	rainy	2017-02-27	natural	yes	yes	no	no	no	no	temporal	yes	no	clear	none	yes	no	mud	2	zero	6.25	non-zero	28.61	15.32	29.1		0.674667	0.602	0.335333	0.685	0.600333	0.325333	0.685667	0.580667	0.337333	0.586333	0.511667	0.342667	10.3119	96.9549	0	76.7191	3.836	59.0054	0.797598	47.9477	0.482753	158.239
urc-2	tdr5_febmar2017	urc	rainy	2017-02-27	artificial	yes	yes	yes	yes	no	no	permanent	no	no	cloudy	total	yes	no	mud	1	zero	5.25	non-zero	18.92	8.5	28.9		0.674	0.559667	0.350667	0.655	0.546	0.306667	0.673667	0.558	0.306	0.561333	0.515333	0.342	13.0888	53.3991	0	49.0627	0	49.639	0.946863	52.2738	0.443043	59.6363
urc-3	tdr5_febmar2017	urc	rainy	2017-02-27	natural	yes	yes	yes	no	yes	no	temporal	no	no	cloudy	partial	yes	yes	mud	1	zero	5.1	non-zero	13.4	5.4	27.6		0.746667	0.589333	0.324667	0.762	0.592333	0.33	0.77	0.611	0.341	0.755	0.6	0.346667	0.379586	99.3446	0	96.0847	0	68.8035	2.68379	66.1123	1.72898	71.3655
urc-4	tdr5_febmar2017	urc	rainy	2017-02-27	natural	yes	yes	yes	no	yes	no	permanent	yes	no	clear	none	yes	no	mud	0.7	zero	5.58	non-zero	18	6.72	29		0.547667	0.517	0.361333	0.618333	0.56	0.336	0.715667	0.577667	0.337333	0.679667	0.554	0.348	16.9288	99.673	0	88.0823	0.0562272	64.9813	1.68093	55.9801	2.13742	59.0717
urc-5	tdr5_febmar2017	urc	rainy	2017-02-27	natural	yes	yes	yes	no	no	no	permanent	yes	no	cloudy	total	yes	no	sand	0.5	zero	5.82	non-zero	6.5	27.9	27.4		0.514	0.513667	0.357333	0.538333	0.537	0.36	0.507667	0.496333	0.363333	0.519667	0.506667	0.349333	74.3029	95.6736	0	70.9446	0	45.0336	0	44.1373	2.06509	30.9936
urc-6	tdr5_febmar2017	urc	rainy	2017-02-27	natural	yes	yes	yes	no	no	no	permanent	yes	no	cloudy	total	yes	no	mud	0.5	non-zero	5.5	non-zero	7.5	3.8	26.2		0.517667	0.526	0.353	0.483667	0.498333	0.339	0.477667	0.478	0.365	0.509	0.491333	0.355667	78.0739	72.1401	0	46.2965	0	43.3468	0	41.4693	2.0049	49.4118
urc-7	tdr5_febmar2017	urc	rainy	2017-02-27	artificial	no	no	no	yes	yes	no	temporal	no	no	cloudy	total	yes	yes			zero	5.5	non-zero	9.8	5	26.4		0.5	0.504333	0.349333	0.523	0.516	0.356333	0.541333	0.530333	0.363667	0.549333	0.521333	0.358333	21.3785	71.9826	0	83.5418	0	55.8774	5.46743	44.0139	1.81602	122.479
urc-8	tdr5_febmar2017	urc	rainy	2017-02-28	natural	yes	yes	yes	no	no	no	temporal	yes	no	cloudy	total	yes	yes	mud	0.7	zero	5.83	zero	14.3	6.21	27.4		0.531667	0.532333	0.328333	0.528667	0.515	0.338333	0.515333	0.487667	0.349333	0.520667	0.451667	0.356333	199.482	56.8692	0	38.1424	0	33.2286	0	39.8666	2.46331	44.1795
urc-9	tdr5_febmar2017	urc	rainy	2017-02-28	natural	yes	yes	yes	no	no	no	permanent	yes	no	cloudy	total	yes	yes	mud	0.8	zero	5.3	non-zero	14.6	4.2	26.7		0.625333	0.449667	0.273333	0.588333	0.438	0.280333	0.557	0.422333	0.274667	0.538	0.400667	0.266667	4.55503	63.1264	0	48.5325	0	35.3282	2.61686	36.7833	0.86154	56.1693
vib-1	tdr5_febmar2017	vib	rainy	2017-03-04	natural	yes	yes	yes	no	yes	no	temporal	yes	no	cloudy	partial	yes	yes	mud	1.64	zero	6.004		55.64	24.08	25.92	549.8	0.71075	0.59075	0.3205	0.7125	0.5925	0.325	0.693	0.5865	0.325	0.69025	0.60575	0.34175	0	100.437	0	98.4907	0	90.167	0	88.6596	1.08383	147.508
[truncated: 31 more columns]

## Sheet: Data Dictionary
Variable	Description	Values
id_cri	Water body unique ID	lib-1, sal-2, lup-3 etc.
collection	Number of collection	icemr1_janfeb2016 etc. (6 collections in icemr sites, 5 in tdr sites)
village	Name of village	lib=Libertad, lup=Lupuna, nho=Nuevo Horizonte, sal=Salvador, sem=Santa Emilia, tri=El Triunfo, urc=Urco Mirano, vib=Visto Bueno
season	Season of collection	dry, rainy
date	Date of collection	date
site_cat	Category of water body (artificial or natural)	artificial (active or abandoned fishpond), natural (pond, pool, river, stream, swamp)
veg_trees	Vegetation - trees	yes, no
veg_bushes	Vegetation - bushes	yes, no
veg_grass	Vegetation - grass	yes, no
veg_floating	Vegetation - floating	yes, no
veg_emergent	Vegetation - emergent	yes, no
veg_algae	Vegetation - algae	yes, no
water_temporality	Water body temporality	temporal, permanent
water_moving	Water - moving	yes, no
water_turbid	Water - turbid	yes, no
cloud_cover	Sky	clear, cloudy
shade_level	Shade	none, partial, total
presence_fish	Presence - fish	yes, no
presence_amphibians	Presence - amphibians	yes, no
bed_material	Ground cover	mud, sand, organic material, mixed
depth_m	Approximate depth of water body	meters
alkalinity	ECO Check - alkalinity	zero, non-zero
ph	ExTECH meter - pH	pH
hardness	ECO Check - hardness	zero, non-zero
conductivity	ExTECH meter - conductivity	uS/cm
salinity_ppm	ExTECH meter - salinity	ppm
temp_c	ExTECH meter - temp	degrees C
light_fc	ExTECH lux meter - light	Fc
evi_50m	Enhanced Vegetation Index (50m buffer)	0-1
ndvi_50m	Normalized Difference Vegetation Index (50m buffer)	0-1
ndwi_50m	Normalized Difference Water Index (50m buffer)	0-1
evi_100m	Enhanced Vegetation Index (100m buffer)	0-1
ndvi_100m	Normalized Difference Vegetation Index (100m buffer)	0-1
ndwi_100m	Normalized Difference Water Index (100m buffer)	0-1
evi_250m	Enhanced Vegetation Index (250m buffer)	0-1
ndvi_250m	Normalized Difference Vegetation Index (250m buffer)	0-1
ndwi_250m	Normalized Difference Water Index (250m buffer)	0-1
evi_500m	Enhanced Vegetation Index (500m buffer)	0-1
ndvi_500m	Normalized Difference Vegetation Index (500m buffer)	0-1
ndwi_500m	Normalized Difference Water Index (500m buffer)	0-1
dist_to_forest	Distance from water body to nearest forest	meters
forestcover16_50m	% Forest in 2016 (50m buffer)	percent
forestloss10.16_50m	% Forest loss between 2010 and 2016 (50m buffer)	percent
forestcover16_100m	% Forest in 2016 (100m buffer)	percent
forestloss10.16_100m	% Forest loss between 2010 and 2016 (100m buffer)	percent
forestcover16_250m	% Forest in 2016 (250m buffer)	percent
forestloss10.16_250m	% Forest loss between 2010 and 2016 (250m buffer)	percent
forestcover16_500m	% Forest in 2016 (500m buffer)	percent
forestloss10.16_500m	% Forest loss between 2010 and 2016 (500m buffer)	percent
disttohouse_m	Distance from water body to nearest inhabited house	meters
num_people_50m	Number of people living within 50m of water body	number
num_people_100m	Number of people living within 100m of water body	number
num_people_250m	Number of people living within 250m of water body	number
num_people_500m	Number of people living within 500m of water body	number
any_people_50m	Any people living within 50m of water body	yes, no
any_people_100m	Any people living within 100m of water body	yes, no
any_people_250m	Any people living within 250m of water body	yes, no
any_people_500m	Any people living within 500m of water body	yes, no
disttonondrycri_m	Distance from water body to neared non-dry water body	meters
disttodarposcri_m	Distance from water body to neared water body ever positive for Ny. darlingi	meters
darlingi_present	Ny. darlingi identified in water body at this collection	yes, no
dunhami_present	Ny. dunhami identified in water body at this collection	yes, no
nrkonderi_present	Ny. sp. nr konderi identified in water body at this collection	yes, no
rangeli_present	Ny. rangeli identified in water body at this collection	yes, no
triannulatus_present	Ny. triannulatus s.l. identified in water body at this collection	yes, no
nondarlingi_present	Any non-Ny. darlingi Nyssorhynchus, Anopheles, or Stethomyia spp. identified in water body at this collection	yes, no
nondunhami_present	Any non-Ny. dunhami Nyssorhynchus, Anopheles, or Stethomyia spp. identified in water body at this collection	yes, no
nonnrkonderi_present	Any non-Ny. sp. nr konderi Nyssorhynchus, Anopheles, or Stethomyia spp. identified in water body at this collection	yes, no
nonrangeli_present	Any non-Ny. rangeli Nyssorhynchus, Anopheles, or Stethomyia spp. identified in water body at this collection	yes, no
nontriannulatus_present	Any non-Ny. triannulatus s.l. Nyssorhynchus, Anopheles, or Stethomyia spp. identified in water body at this collection	yes, no
n_species	Number of species identified in water body at this collection	number
anopheles_present	Any Nyssorhynchus, Anopheles, or Stethomyia spp. identified in water body at this collection	yes, no
cri_type	Type of water body	abandoned fishpond, active fishpond, pond, pool, river, stream, swamp
cri_cat	Alternate category of water body (managed or not managed)	managed (active fishpond), not managed (abandoned fishpond, pond, pool, river, stream, swamp)
month	Month of collection	2016-01 through 2017-03
quarter	Quarter of collection	2016.01, 2016.02, 2016.03, 2016.04, 2017.01
locality_cat_dar	Locality categories for Ny. darlingi presence	high (lib, lup, nho, sal, vbu), low (sem, tri, urc)
locality_cat_rantri	Locality categories for Ny. rangeli and triannulatus presences	high (sal, urc), low (lib, lup, nho, sem, tri, vbu)
bed_material_organic	Ground cover is organic	yes, no
bed_material_mixed	Ground cover is mixed	yes, no
bed_material_mud	Ground cover is mud	yes, no
